# Supplementary material for: How should you measure your excitonic solar cells?
Source: Royal Society of Chemistry journal article supplement (doi:10.1039/c2ee03429h), 2012-01-01
Supplement: c2ee03429h.xlsx [file c2ee03429h.xlsx]

## Sheet: Mismatch Spread Sheet
		ER(l)	ES(l)		IPCER(l)	SR(l)	IPCET(l)	ST(l)	ER(l)SR(l)	ES(l)SR(l)	ES* (l)	ES(l)ST(l)	ER(l)ST(l)
Wavelength(nm)	Energy(eV)	AM1.5G(Wm-2nm-1)	Lamp Power (Wnm-1)		(%)	A/(Wnm)	(%)	A/(Wnm)			(Wm-2nm-1)
280	4.42857	4.7309e-23	0		0.191438	0.000432279	0	0	2.04507e-26	0	0	0	0			JT,AM1.5(mAcm-2)	10.9097		Should be close to what you measure under solar simulator
281	4.41281	5.6895e-21	0		0.284437	0.00064457	0	0	3.66728e-24	0	0	0	0			JR,AM1.5(mAcm-2)	10.7489		Should be close to certified value
282	4.39716	1.1946e-18	0		0.377429	0.000858347	0	0	1.02538e-21	0	0	0	0
283	4.38163	1.8452e-17	0		0.470422	0.00107362	0	0	1.98105e-20	0	0	0	0			M:	1.0057		Need to set short-circuit current on reference cell to 1/M of certified value
284	4.3662	7.267e-16	0		0.563414	0.0012904	0	0	9.37734e-19	0	0	0	0
285	4.35088	8.0142e-15	0		0.656413	0.00150869	0	0	1.2091e-17	0	0	0	0
286	4.33566	1.3684e-13	0		0.749406	0.00172847	0	0	2.36524e-16	0	0	0	0
287	4.32056	2.7367e-12	0		0.842398	0.00194974	0	0	5.33587e-15	0	0	0	0
288	4.30556	6.2337e-11	0		0.935391	0.00217252	0	0	1.35428e-13	0	0	0	0
289	4.29066	5.6265e-10	0		1.02839	0.00239681	0	0	1.34857e-12	0	0	0	0
290	4.27586	6.0168e-09	0		1.12138	0.00262259	0	0	1.57796e-11	0	0	0	0
291	4.26117	3.5052e-08	0		1.10857	0.00260157	0	0	9.11903e-11	0	0	0	0
292	4.24658	2.683e-07	0		1.09576	0.00258035	0	0	6.92308e-10	0	0	0	0
293	4.23208	8.6466e-07	0		1.08296	0.00255892	0	0	2.21259e-09	0	0	0	0
294	4.21769	4.1744e-06	0		1.07015	0.00253728	0	0	1.05916e-08	0	0	0	0
295	4.20339	1.229e-05	0		1.05734	0.00251544	0	0	3.09148e-08	0	0	0	0
296	4.18919	4.7904e-05	0		1.04453	0.00249339	0	0	1.19443e-07	0	0	0	0
297	4.17508	9.68e-05	0		1.03172	0.00247113	0	0	2.39206e-07	0	0	0	0
298	4.16107	0.00028988	0		1.01891	0.00244867	0	0	7.09821e-07	0	0	0	0
299	4.14716	0.00049211	0		1.0061	0.002426	0	0	1.19386e-06	0	0	0	0
300	4.13333	0.00102	0		0.993293	0.00240313	5.583	0.0135073	2.45119e-06	0	0	0	1.37774e-05
301	4.1196	0.00193	0		0.980484	0.00238005	6.00428	0.0145749	4.59349e-06	0	0	0	2.81296e-05
302	4.10596	0.00292	0		0.967675	0.00235676	6.45622	0.015724	6.88173e-06	0	0	0	4.59141e-05
303	4.09241	0.00709	0		0.954866	0.00233326	6.93791	0.0169531	1.65428e-05	0	0	0	0.000120198
304	4.07895	0.00947	0		0.942057	0.00230956	7.44847	0.0182608	2.18715e-05	0	0	0	0.000172929
305	4.06557	0.01646	0		1.14348	0.00281258	7.987	0.0196454	4.62951e-05	0	0	0	0.000323364
306	4.05229	0.01858	0		1.3449	0.00331886	8.55262	0.0211057	6.16644e-05	0	0	0	0.000392143
307	4.03909	0.02785	0		1.54632	0.0038284	9.14443	0.0226398	0.000106621	0	0	0	0.00063052
308	4.02597	0.03784	0		1.74774	0.00434117	9.76153	0.0242464	0.00016427	0	0	0	0.000917483
309	4.01294	0.04053	0		1.94917	0.00485719	10.403	0.0259237	0.000196862	0	0	0	0.00105069
310	4	0.05094	0		2.15059	0.00537646	11.0681	0.0276702	0.000273877	0	0	0	0.00140952
311	3.98714	0.08292	0		2.35201	0.00589898	11.7557	0.0294841	0.000489144	0	0	0	0.00244482
312	3.97436	0.09338	0		2.55343	0.00642477	12.4651	0.0313638	0.000599945	0	0	0	0.00292875
313	3.96166	0.10733	0		2.75485	0.00695378	13.1953	0.0333076	0.000746349	0	0	0	0.0035749
314	3.94904	0.11969	0		2.95627	0.00748605	13.9455	0.0353136	0.000896005	0	0	0	0.00422669
315	3.93651	0.13625	0		3.15769	0.00802156	14.7147	0.0373802	0.00109294	0	0	0	0.00509305
316	3.92405	0.12348	0		3.35912	0.00856034	15.5021	0.0395054	0.00105703	0	0	0	0.00487813
317	3.91167	0.17158	0		3.56054	0.00910235	16.3068	0.0416875	0.00156178	0	0	0	0.00715274
318	3.89937	0.17594	0		3.76196	0.00964761	17.1278	0.0439246	0.0016974	0	0	0	0.00772809
319	3.88715	0.2047	0		3.96338	0.0101961	17.9644	0.0462148	0.00208715	0	0	0	0.00946017
320	3.875	0.20527	0		4.1648	0.0107479	18.8155	0.0485561	0.00220622	0	0	0	0.00996712
321	3.86293	0.25024	0		4.36623	0.0113029	19.6801	0.0509462	0.00282844	0	0	0	0.0127488
322	3.85093	0.22203	0		4.56765	0.0118612	20.5565	0.0533805	0.00263353	0	0	0	0.0118521
323	3.83901	0.21226	0		4.76907	0.0124227	21.4424	0.055854	0.00263683	0	0	0	0.0118556
324	3.82716	0.27537	0		5.43588	0.0142034	22.336	0.0583617	0.0039112	0	0	0	0.0160711
325	3.81538	0.27894	0		6.10269	0.015995	23.2351	0.0608984	0.00446164	0	0	0	0.016987
326	3.80368	0.3812	0		6.76951	0.0177973	24.1377	0.0634588	0.00678431	0	0	0	0.0241905
327	3.79205	0.39806	0		7.43632	0.0196103	25.0418	0.0660377	0.00780607	0	0	0	0.026287
328	3.78049	0.35116	0		8.10313	0.0214341	25.9454	0.0686298	0.0075268	0	0	0	0.0241
329	3.769	0.42235	0		8.76994	0.0232686	26.8464	0.0712296	0.00982751	0	0	0	0.0300838
330	3.75758	0.47139	0		9.43676	0.025114	27.7428	0.0738316	0.0118385	0	0	0	0.0348035
331	3.74622	0.40262	0		10.1036	0.02697	28.6327	0.0764308	0.0108587	0	0	0	0.0307726
332	3.73494	0.43623	0		10.7704	0.0288368	29.5151	0.0790242	0.0125795	0	0	0	0.0344727
333	3.72372	0.42944	0		11.4372	0.0307144	30.389	0.0816091	0.01319	0	0	0	0.0350462
334	3.71257	0.41497	0		12.104	0.0326027	31.2535	0.0841828	0.0135292	0	0	0	0.0349334
335	3.70149	0.46388	0		12.7708	0.0345018	32.1078	0.0867428	0.0160047	0	0	0	0.0402383
336	3.69048	0.41519	0		13.4376	0.0364116	32.9509	0.0892864	0.0151178	0	0	0	0.0370708
337	3.67953	0.3738	0		14.1044	0.0383322	33.782	0.0918107	0.0143286	0	0	0	0.0343189
338	3.66864	0.43411	0		14.7713	0.0402636	34.6001	0.0943131	0.0174788	0	0	0	0.0409423
339	3.65782	0.46355	0		15.4381	0.0422057	35.4043	0.0967909	0.0195644	0	0	0	0.0448674
340	3.64706	0.5018	0		16.1049	0.0441585	36.1938	0.0992411	0.0221588	0	0	0	0.0497992
341	3.63636	0.47139	0.32389		16.7717	0.0461222	36.9672	0.10166	0.0217415	0.0149385	0.346372	0.0329266	0.0479214
342	3.62573	0.48934	0.32389		17.4874	0.0482313	37.7215	0.104038	0.0236015	0.0156216	0.346372	0.033697	0.0509102
343	3.61516	0.51489	0.32927		18.2031	0.0503521	38.4535	0.106367	0.0259258	0.0165794	0.352125	0.0350236	0.0547675
344	3.60465	0.41843	0.33951		18.9188	0.0524843	39.1596	0.108636	0.021961	0.0178189	0.363076	0.0368831	0.0454567
345	3.5942	0.45898	0.35411		19.6345	0.0546281	39.8366	0.110836	0.0250732	0.0193444	0.378689	0.0392481	0.0508714
346	3.58382	0.47778	0.37257		20.3501	0.0567835	40.4811	0.112955	0.02713	0.0211558	0.398431	0.0420838	0.0539678
347	3.57349	0.49404	0.39436		21.0658	0.0589504	41.0897	0.114985	0.0291238	0.0232477	0.421733	0.0453454	0.0568071
348	3.56322	0.47511	0.41899		21.7815	0.0611288	41.6589	0.116914	0.0290429	0.0256123	0.448073	0.0489857	0.0555469
349	3.55301	0.46564	0.44593		22.4972	0.0633188	42.1856	0.118732	0.0294837	0.0282357	0.476883	0.0529462	0.0552864
350	3.54286	0.52798	0.47469		23.2129	0.0655203	42.6662	0.120429	0.0345934	0.0311018	0.507639	0.0571664	0.063584
351	3.53276	0.55172	0.50476		23.9286	0.0677333	43.0986	0.121997	0.0373698	0.0341891	0.539796	0.0615791	0.0673081
352	3.52273	0.51791	0.53562		24.6065	0.0698507	43.4851	0.123442	0.0361764	0.0374134	0.572798	0.0661177	0.0639316
353	3.51275	0.5204	0.56676		25.2844	0.071979	43.8292	0.124772	0.0374579	0.0407948	0.6061	0.0707157	0.0649313
354	3.50282	0.60498	0.59774		25.9623	0.0741182	44.1345	0.125997	0.04484	0.0443034	0.63923	0.0753133	0.0762255
355	3.49296	0.6114	0.62824		26.6402	0.0762683	44.4044	0.127125	0.0466305	0.0479148	0.671847	0.0798653	0.0777245
356	3.48315	0.55387	0.65801		27.3181	0.0784294	44.6424	0.128167	0.0434397	0.0516073	0.703683	0.0843352	0.0709879
357	3.47339	0.45673	0.68676		27.996	0.0806014	44.8522	0.129131	0.0368131	0.0553538	0.734429	0.0886819	0.0589779
358	3.46369	0.43006	0.71425		28.6739	0.0827844	45.0371	0.130026	0.0356023	0.0591288	0.763827	0.0928714	0.0559192
359	3.45404	0.46953	0.74018		29.3518	0.0849783	45.2007	0.130863	0.0398998	0.0628992	0.791557	0.0968624	0.0614443
360	3.44444	0.59817	0.7643		30.0297	0.0871831	45.3465	0.131651	0.0521503	0.066634	0.817351	0.100621	0.0787498
361	3.4349	0.52024	0.78634		30.7076	0.0893988	45.4774	0.132398	0.0465089	0.0702979	0.840921	0.10411	0.0688787
362	3.42541	0.5342	0.80602		31.3855	0.0916255	45.5936	0.133104	0.0489464	0.073852	0.861967	0.107284	0.0711041
363	3.41598	0.60191	0.82308		31.968	0.0935837	45.6946	0.133767	0.056329	0.0770269	0.880211	0.110101	0.0805158
364	3.40659	0.60628	0.83724		32.5504	0.0955512	45.78	0.134387	0.0579308	0.0799993	0.895354	0.112514	0.0814759
365	3.39726	0.62359	0.84824		33.1329	0.0975282	45.8494	0.13496	0.0608176	0.0827273	0.907118	0.114479	0.0841598
366	3.38798	0.73532	0.85592		33.7153	0.0995145	45.9024	0.135486	0.073175	0.0851764	0.915331	0.115965	0.0996257
367	3.37875	0.72285	0.86048		34.2977	0.10151	45.9386	0.135963	0.0733767	0.0873475	0.920207	0.116994	0.0982811
368	3.36957	0.66759	0.86225		34.8802	0.103515	45.9574	0.13639	0.0691058	0.0892561	0.9221	0.117602	0.0910524
369	3.36043	0.69315	0.86157		35.4626	0.10553	45.9585	0.136764	0.073148	0.0909214	0.921373	0.117831	0.0947977
370	3.35135	0.75507	0.85875		36.045	0.107554	45.9414	0.137083	0.0812106	0.0923618	0.918357	0.11772	0.103508
371	3.34232	0.69338	0.85411		36.6275	0.109587	45.9066	0.13735	0.0759855	0.0935994	0.913395	0.117312	0.0952355
372	3.33333	0.67444	0.84797		37.2099	0.11163	45.8576	0.137573	0.0752876	0.0946587	0.906829	0.116658	0.0927846
373	3.3244	0.61886	0.84067		37.7293	0.113492	45.7989	0.137766	0.0702358	0.0954095	0.899022	0.115816	0.0852579
374	3.31551	0.5564	0.83252		38.2487	0.115363	45.7349	0.137943	0.064188	0.096042	0.890306	0.11484	0.0767512
375	3.30667	0.5893	0.82384		38.7681	0.117242	45.6701	0.138115	0.0690908	0.0965888	0.881024	0.113785	0.0813914
376	3.29787	0.6748	0.81497		39.2875	0.11913	45.6089	0.138298	0.0803887	0.0970872	0.871538	0.112709	0.0933235
377	3.28912	0.71225	0.80621		39.8068	0.121026	45.5558	0.138504	0.0862005	0.0975721	0.86217	0.111663	0.0986496
378	3.28042	0.85595	0.79789		40.3262	0.12293	45.5151	0.138747	0.105222	0.0980846	0.853273	0.110705	0.118761
379	3.27177	0.74389	0.79024		40.8456	0.124843	45.4913	0.139042	0.0928692	0.0986557	0.845092	0.109876	0.103432
380	3.26316	0.70077	0.78345		41.365	0.126764	45.4888	0.139401	0.0888322	0.099313	0.83783	0.109214	0.0976882
381	3.25459	0.76383	0.77772		41.8844	0.128693	45.511	0.139836	0.0982997	0.100087	0.831703	0.108753	0.106811
382	3.24607	0.58678	0.77325		42.1289	0.129784	45.5565	0.140343	0.0761548	0.100356	0.826922	0.10852	0.0823506
383	3.2376	0.45499	0.77023		42.3734	0.130879	45.6227	0.140915	0.0595488	0.100807	0.823693	0.108537	0.064115
384	3.22917	0.50968	0.76886		42.618	0.131978	45.7072	0.141545	0.0672667	0.101473	0.822228	0.108828	0.0721426
385	3.22078	0.67355	0.76933		42.8625	0.133081	45.8075	0.142225	0.0896368	0.102383	0.82273	0.109418	0.0957956
386	3.21244	0.621	0.77185		43.107	0.134188	45.9211	0.142948	0.0833308	0.103573	0.825425	0.110334	0.0887706
387	3.20413	0.65147	0.77661		43.3516	0.135299	46.0453	0.143706	0.0881431	0.105074	0.830516	0.111604	0.0936202
388	3.19588	0.63582	0.7838		43.5961	0.136414	46.1779	0.144492	0.0867345	0.106921	0.838205	0.113253	0.091871
389	3.18766	0.68543	0.79363		43.8406	0.137532	46.3162	0.145298	0.0942687	0.10915	0.848717	0.115313	0.0995919
390	3.17949	0.79699	0.80628		44.0851	0.138655	46.4578	0.146117	0.110507	0.111795	0.862245	0.117811	0.116454
391	3.17136	0.85138	0.82167		44.3297	0.139781	46.6004	0.146942	0.119007	0.114854	0.878703	0.120738	0.125103
392	3.16327	0.79493	0.83936		44.5742	0.140912	46.7433	0.147769	0.112015	0.118276	0.897621	0.124031	0.117466
393	3.15522	0.47975	0.85891		44.8187	0.142046	46.8857	0.148598	0.0681468	0.122005	0.918528	0.127632	0.0712897
394	3.14721	0.49567	0.87986		45.0633	0.143185	47.0274	0.149426	0.0709724	0.125983	0.940932	0.131474	0.0740658
395	3.13924	0.80772	0.90174		45.3078	0.144327	47.1675	0.150251	0.116576	0.130146	0.964331	0.135488	0.121361
396	3.13131	0.75655	0.92411		45.5523	0.145474	47.3058	0.151073	0.110058	0.134434	0.988254	0.139608	0.114294
397	3.12343	0.42619	0.9465		45.7968	0.146624	47.4415	0.151889	0.0624896	0.138779	1.0122	0.143763	0.0647337
398	3.11558	0.85249	0.96846		46.0414	0.147778	47.5742	0.152698	0.125979	0.143117	1.03568	0.147882	0.130173
399	3.10777	1.0693	0.98954		46.2859	0.148936	47.7033	0.153497	0.159257	0.147378	1.05823	0.151891	0.164134
400	3.1	1.1141	1.00928		46.4379	0.1498	47.8282	0.154285	0.166892	0.15119	1.07934	0.155716	0.171888
401	3.09227	1.1603	1.02721		46.5899	0.150666	47.9492	0.155061	0.174817	0.154765	1.09851	0.159281	0.179918
402	3.08458	1.2061	1.04289		46.7419	0.151534	48.0687	0.155836	0.182765	0.158033	1.11528	0.162519	0.187953
403	3.07692	1.1613	1.05597		46.8939	0.152405	48.19	0.156618	0.176988	0.160935	1.12927	0.165384	0.18188
404	3.06931	1.1801	1.06658		47.0459	0.153279	48.3165	0.157418	0.180884	0.163484	1.14061	0.167899	0.185769
405	3.06173	1.1511	1.07496		47.1979	0.154154	48.4513	0.158248	0.177447	0.16571	1.14957	0.170111	0.18216
406	3.05419	1.1227	1.08133		47.3499	0.155033	48.5977	0.159118	0.174055	0.167641	1.15639	0.17206	0.178642
407	3.04668	1.1026	1.08595		47.5019	0.155913	48.759	0.16004	0.17191	0.169314	1.16133	0.173795	0.17646
408	3.03922	1.1514	1.08904		47.6539	0.156797	48.9384	0.161023	0.180536	0.170758	1.16463	0.175361	0.185402
409	3.03178	1.2299	1.09084		47.8058	0.157682	49.1392	0.16208	0.193933	0.172006	1.16656	0.176804	0.199342
410	3.02439	1.0485	1.0916		47.9578	0.15857	49.3646	0.163222	0.166261	0.173095	1.16737	0.178173	0.171138
411	3.01703	1.1738	1.09154		48.1098	0.159461	49.617	0.164456	0.187175	0.174058	1.16731	0.179511	0.193039
412	3.00971	1.2478	1.09091		48.2618	0.160354	49.8948	0.165779	0.20009	0.174932	1.16663	0.18085	0.206859
413	3.00242	1.1971	1.08995		48.4138	0.161249	50.1954	0.167183	0.193032	0.175754	1.1656	0.182221	0.200135
414	2.99517	1.1842	1.08889		48.5658	0.162147	50.5164	0.16866	0.192015	0.17656	1.16447	0.183652	0.199727
415	2.98795	1.2258	1.08796		48.7178	0.163048	50.8554	0.170202	0.199864	0.177389	1.16348	0.185173	0.208633
416	2.98077	1.2624	1.08734		48.8698	0.16395	51.2098	0.171801	0.206971	0.17827	1.16281	0.186806	0.216881
417	2.97362	1.2312	1.08714		49.0218	0.164856	51.5772	0.173449	0.20297	0.179221	1.1626	0.188563	0.21355
418	2.96651	1.1777	1.08748		49.1738	0.165763	51.9549	0.175138	0.195219	0.180264	1.16296	0.19046	0.206261
419	2.95943	1.2258	1.08849		49.3258	0.166673	52.3407	0.176861	0.204308	0.181422	1.16404	0.192511	0.216796
420	2.95238	1.1232	1.09027		49.4778	0.167586	52.7319	0.178608	0.188233	0.182714	1.16595	0.194731	0.200612
421	2.94537	1.2757	1.09294		49.6298	0.168501	53.1268	0.180374	0.214957	0.184162	1.1688	0.197138	0.230103
422	2.93839	1.2583	1.09662		49.9017	0.169827	53.5272	0.182165	0.213693	0.186236	1.17274	0.199766	0.229219
423	2.93144	1.2184	1.10144		50.1737	0.171157	53.9355	0.18399	0.208538	0.188519	1.17789	0.202654	0.224173
424	2.92453	1.2117	1.10751		50.4456	0.172491	54.3542	0.185856	0.209008	0.191036	1.18438	0.205838	0.225202
425	2.91765	1.2488	1.11494		50.7175	0.17383	54.7857	0.187774	0.217079	0.19381	1.19233	0.209356	0.234492
426	2.9108	1.2135	1.12385		50.9895	0.175174	55.2325	0.18975	0.212573	0.196869	1.20186	0.213251	0.230262
427	2.90398	1.1724	1.13437		51.2614	0.176521	55.697	0.191795	0.206953	0.20024	1.21311	0.217567	0.224861
428	2.8972	1.1839	1.14648		51.5334	0.177873	56.1818	0.193918	0.210584	0.203928	1.22606	0.222323	0.229579
429	2.89044	1.0963	1.15991		51.8053	0.17923	56.6893	0.196127	0.196489	0.20789	1.24042	0.227489	0.215014
430	2.88372	0.87462	1.17434		52.0772	0.18059	57.2219	0.198431	0.157948	0.212075	1.25585	0.233025	0.173552
431	2.87703	0.79394	1.18946		52.3492	0.181956	57.7812	0.200836	0.144462	0.216429	1.27202	0.238887	0.159452
432	2.87037	1.3207	1.20495		52.6211	0.183325	58.3652	0.203337	0.242118	0.220898	1.28859	0.245011	0.268547
433	2.86374	1.2288	1.2205		52.893	0.184699	58.9707	0.205922	0.226958	0.225425	1.30522	0.251328	0.253037
434	2.85714	1.1352	1.23578		53.165	0.186077	59.5948	0.208582	0.211235	0.229951	1.32156	0.257761	0.236782
435	2.85057	1.2452	1.25049		53.4369	0.18746	60.2344	0.211306	0.233425	0.234417	1.33729	0.264236	0.263118
436	2.84404	1.3659	1.26431		53.7089	0.188847	60.8865	0.214085	0.257947	0.238762	1.35207	0.27067	0.292419
437	2.83753	1.3943	1.27692		53.9808	0.190239	61.5482	0.216908	0.26525	0.24292	1.36555	0.276974	0.302434
438	2.83105	1.2238	1.28801		54.2527	0.191635	62.2163	0.219764	0.234523	0.246827	1.37741	0.283058	0.268947
439	2.8246	1.1775	1.29724		54.5247	0.193035	62.8878	0.222643	0.227299	0.250413	1.38728	0.288822	0.262162
440	2.81818	1.3499	1.30427		54.7966	0.19444	63.5598	0.225535	0.262474	0.253602	1.3948	0.294158	0.304449
441	2.81179	1.3313	1.30873		54.9266	0.195344	64.2298	0.22843	0.260061	0.255652	1.39957	0.298953	0.304109
442	2.80543	1.425	1.31028		55.0567	0.19625	64.8978	0.231329	0.279657	0.257143	1.40123	0.303106	0.329644
443	2.7991	1.4453	1.30856		55.1867	0.197159	65.5645	0.234235	0.284954	0.257994	1.39939	0.30651	0.338539
444	2.79279	1.4084	1.30324		55.3167	0.19807	66.2306	0.237148	0.278961	0.258132	1.3937	0.309061	0.334
445	2.78652	1.4619	1.29686		55.4467	0.198982	66.8967	0.240073	0.290892	0.258052	1.38688	0.311341	0.350962
446	2.78027	1.3108	1.29842		55.5768	0.199897	67.5633	0.24301	0.262025	0.25955	1.38855	0.315529	0.318538
447	2.77405	1.4903	1.31781		55.7068	0.200814	68.2312	0.245963	0.299273	0.264635	1.40928	0.324132	0.366558
448	2.76786	1.5081	1.359		55.8368	0.201733	68.9011	0.248933	0.304234	0.274155	1.45333	0.3383	0.375416
449	2.76169	1.5045	1.40854		55.9668	0.202654	69.5735	0.251923	0.304893	0.285446	1.50631	0.354844	0.379019
450	2.75556	1.5595	1.4497		56.0969	0.203577	70.249	0.254936	0.317479	0.295126	1.55033	0.369581	0.397573
451	2.74945	1.6173	1.47077		56.2269	0.204503	70.9276	0.25797	0.330742	0.300776	1.57286	0.379415	0.417216
452	2.74336	1.5482	1.47474		56.3569	0.20543	71.6052	0.261012	0.318047	0.302956	1.5771	0.384926	0.4041
453	2.73731	1.4297	1.46736		56.4869	0.20636	72.2772	0.264045	0.295032	0.302804	1.56921	0.387449	0.377505
454	2.73128	1.5335	1.45466		56.617	0.207291	72.9388	0.26705	0.317881	0.301538	1.55563	0.388467	0.409521
455	2.72527	1.5224	1.44384		56.747	0.208225	73.5854	0.270011	0.317002	0.300643	1.54406	0.389852	0.411064
456	2.7193	1.5724	1.44242		56.877	0.209161	74.2121	0.272909	0.328884	0.301698	1.54254	0.393649	0.429122
457	2.71335	1.5854	1.45611		57.007	0.210099	74.8142	0.275727	0.33309	0.305927	1.55718	0.401488	0.437137
458	2.70742	1.5514	1.48342		57.1371	0.211039	75.3871	0.278446	0.327405	0.313059	1.58639	0.413052	0.431981
459	2.70153	1.5391	1.52106		57.2671	0.211981	75.9259	0.281048	0.326259	0.322435	1.62664	0.427491	0.432561
460	2.69565	1.5291	1.56576		57.3971	0.212925	76.4259	0.283516	0.325583	0.333389	1.67444	0.443917	0.433524
461	2.6898	1.5827	1.61422		57.5781	0.214061	76.8839	0.285835	0.338794	0.345541	1.72627	0.4614	0.45239
462	2.68398	1.5975	1.66316		57.7591	0.215199	77.3021	0.288013	0.343781	0.357911	1.7786	0.479011	0.4601
463	2.67819	1.6031	1.71062		57.9401	0.216341	77.6843	0.290063	0.346816	0.370077	1.82936	0.496188	0.465
464	2.67241	1.5544	1.76175		58.1211	0.217485	78.0343	0.291999	0.338059	0.383155	1.88404	0.51443	0.453884
465	2.66667	1.535	1.82412		58.3021	0.218633	78.3556	0.293834	0.335601	0.398812	1.95073	0.535988	0.451035
466	2.66094	1.5673	1.90271		58.483	0.219783	78.6522	0.29558	0.344466	0.418183	2.03478	0.562403	0.463263
467	2.65525	1.4973	1.98359		58.664	0.220936	78.9278	0.297252	0.330808	0.438247	2.12127	0.589627	0.445076
468	2.64957	1.5619	2.04429		58.845	0.222092	79.186	0.298863	0.346886	0.454021	2.18619	0.610964	0.466795
469	2.64392	1.5682	2.0635		59.026	0.223252	79.4307	0.300427	0.350103	0.46068	2.20673	0.619932	0.47113
470	2.6383	1.5077	2.02889		59.207	0.224414	79.6655	0.301958	0.338348	0.455311	2.16972	0.61264	0.455262
471	2.6327	1.5331	1.95523		59.388	0.225579	79.8937	0.303467	0.345834	0.441058	2.09095	0.593348	0.465245
472	2.62712	1.6126	1.89208		59.569	0.226746	80.1157	0.304956	0.365651	0.429022	2.02341	0.577002	0.491773
473	2.62156	1.5499	1.84604		59.75	0.227917	80.3315	0.306426	0.353249	0.420744	1.97418	0.565674	0.474929
474	2.61603	1.5671	1.7961		59.9309	0.229091	80.5412	0.307875	0.359008	0.41147	1.92077	0.552975	0.482471
475	2.61053	1.6185	1.72377		60.1119	0.230267	80.7447	0.309304	0.372688	0.396928	1.84342	0.533169	0.500609
476	2.60504	1.5631	1.63987		60.2929	0.231447	80.9419	0.310712	0.361775	0.379543	1.7537	0.509528	0.485675
477	2.59958	1.5724	1.57254		60.4739	0.232629	81.1328	0.3121	0.365786	0.365819	1.68169	0.490789	0.490746
478	2.59414	1.623	1.54726		60.6549	0.233815	81.3175	0.313466	0.379481	0.361772	1.65466	0.485013	0.508755
479	2.58873	1.5916	1.5597		60.8359	0.235003	81.4958	0.31481	0.374031	0.366534	1.66796	0.49101	0.501052
480	2.58333	1.6181	1.58795		60.9384	0.23589	81.6678	0.316133	0.381694	0.374582	1.69817	0.502004	0.511535
481	2.57796	1.6177	1.61101		61.0409	0.23678	81.8332	0.317434	0.383038	0.381454	1.72283	0.511389	0.513512
482	2.57261	1.6236	1.61984		61.1434	0.23767	81.9912	0.318708	0.385881	0.384988	1.73228	0.516256	0.517454
483	2.56729	1.6038	1.61239		61.2459	0.238563	82.141	0.319952	0.382607	0.384656	1.72431	0.515888	0.51314
484	2.56198	1.5734	1.58675		61.3484	0.239457	82.2814	0.321163	0.376761	0.379958	1.69689	0.509605	0.505318
485	2.5567	1.5683	1.54096		61.4509	0.240352	82.4116	0.322336	0.376944	0.370373	1.64792	0.496707	0.505519
486	2.55144	1.2716	1.47821		61.5534	0.24125	82.5307	0.323467	0.306773	0.356618	1.58081	0.478152	0.411321
487	2.5462	1.4241	1.41681		61.6559	0.242149	82.6375	0.324552	0.344844	0.343079	1.51515	0.459829	0.462195
488	2.54098	1.5413	1.37785		61.7584	0.243049	82.7312	0.325587	0.374612	0.334885	1.47349	0.44861	0.501828
489	2.53579	1.4519	1.3738		61.8609	0.243951	82.8108	0.326568	0.354193	0.335141	1.46916	0.44864	0.474145
490	2.53061	1.6224	1.3914		61.9634	0.244855	82.8753	0.327491	0.397253	0.340692	1.48798	0.455671	0.531322
491	2.52546	1.5595	1.41266		62.0659	0.245761	82.9246	0.328355	0.383264	0.347177	1.51071	0.463853	0.512069
492	2.52033	1.4869	1.42319		62.1684	0.246668	82.961	0.329168	0.366771	0.351056	1.52198	0.468469	0.48944
493	2.51521	1.5903	1.41945		62.2709	0.247577	82.988	0.329944	0.393722	0.351423	1.51798	0.468339	0.52471
494	2.51012	1.5525	1.39989		62.3734	0.248488	83.0087	0.330696	0.385777	0.347855	1.49706	0.462938	0.513406
495	2.50505	1.6485	1.36562		62.4759	0.2494	83.0265	0.331436	0.411136	0.340585	1.46041	0.452616	0.546373
496	2.5	1.5676	1.32572		62.5784	0.250314	83.0445	0.332178	0.392392	0.331846	1.41774	0.440375	0.520722
497	2.49497	1.5944	1.29072		62.6809	0.251229	83.066	0.332934	0.40056	0.324267	1.38031	0.429725	0.53083
498	2.48996	1.5509	1.26824		62.7834	0.252146	83.0944	0.333718	0.391054	0.319782	1.35627	0.423234	0.517563
499	2.48497	1.5507	1.25719		62.8859	0.253065	83.1328	0.334543	0.392428	0.318151	1.34445	0.420584	0.518775
500	2.48	1.5451	1.2549		62.887	0.253577	83.1846	0.335422	0.391802	0.318214	1.342	0.420921	0.51826
501	2.47505	1.4978	1.25869		62.8881	0.254088	83.2519	0.336364	0.380574	0.319819	1.34606	0.423378	0.503807
502	2.47012	1.4966	1.26588		62.8892	0.2546	83.3328	0.337363	0.381034	0.322293	1.35375	0.427062	0.504898
503	2.46521	1.5653	1.27379		62.8903	0.255112	83.4244	0.338407	0.399326	0.324959	1.36221	0.431059	0.529708
504	2.46032	1.4587	1.28063		62.8914	0.255623	83.5237	0.339484	0.372878	0.327359	1.36952	0.434753	0.495205
505	2.45545	1.5635	1.28656		62.8925	0.256135	83.6278	0.340581	0.400467	0.329533	1.37586	0.438178	0.532499
506	2.45059	1.6264	1.29199		62.8936	0.256647	83.7338	0.341688	0.41741	0.331585	1.38167	0.441457	0.555721
507	2.44576	1.556	1.29736		62.8947	0.257158	83.8386	0.342792	0.400138	0.333627	1.38741	0.444724	0.533384
508	2.44094	1.5165	1.30309		62.8958	0.25767	83.9394	0.343881	0.390757	0.335767	1.39354	0.448108	0.521495
509	2.43615	1.5893	1.3096		62.8969	0.258182	84.0332	0.344943	0.410328	0.338115	1.4005	0.451737	0.548217
510	2.43137	1.5481	1.31714		62.898	0.258693	84.117	0.345965	0.400483	0.340735	1.40856	0.455684	0.535588
511	2.42661	1.5769	1.32552		62.8991	0.259205	84.1886	0.346939	0.408741	0.343582	1.41753	0.459874	0.547088
512	2.42188	1.6186	1.3345		62.9002	0.259717	84.2494	0.347869	0.420378	0.346592	1.42713	0.464231	0.56306
513	2.41715	1.5206	1.34385		62.9013	0.260229	84.3013	0.348763	0.395704	0.349708	1.43713	0.468685	0.530328
514	2.41245	1.4885	1.35333		62.9024	0.260741	84.3462	0.349629	0.388112	0.352868	1.44727	0.473163	0.520422
515	2.40777	1.5314	1.3627		62.9035	0.261252	84.3863	0.350475	0.400082	0.356009	1.45729	0.477592	0.536718
516	2.4031	1.5455	1.37173		62.9046	0.261764	84.4234	0.35131	0.404557	0.35907	1.46694	0.481903	0.54295
517	2.39845	1.2594	1.38018		62.9057	0.262276	84.4596	0.352142	0.330311	0.361988	1.47598	0.486019	0.443488
518	2.39382	1.4403	1.38782		62.9068	0.262788	84.4969	0.352979	0.378494	0.364703	1.48415	0.489871	0.508396
519	2.38921	1.3957	1.3944		62.9079	0.2633	84.5373	0.35383	0.367488	0.367145	1.49119	0.49338	0.49384
520	2.38462	1.5236	1.39969		62.9452	0.263964	84.5829	0.354702	0.402175	0.369467	1.49684	0.496473	0.540424
521	2.38004	1.5346	1.40345		62.9825	0.264628	84.6348	0.355602	0.406098	0.371392	1.50087	0.49907	0.545708
522	2.37548	1.569	1.40562		63.0198	0.265293	84.6914	0.356524	0.416245	0.372901	1.50319	0.501137	0.559386
523	2.37094	1.4789	1.40637		63.0571	0.265958	84.7505	0.357456	0.393326	0.374036	1.50399	0.502715	0.528642
524	2.36641	1.5905	1.40593		63.0944	0.266625	84.8097	0.35839	0.424066	0.374856	1.50352	0.503871	0.570019
525	2.3619	1.5781	1.40452		63.1317	0.267291	84.8667	0.359315	0.421813	0.375416	1.50201	0.504665	0.567035
526	2.35741	1.5341	1.40236		63.169	0.267959	84.9191	0.360221	0.411075	0.375775	1.4997	0.50516	0.552616
527	2.35294	1.3417	1.39965		63.2063	0.268627	84.9646	0.3611	0.360416	0.375983	1.4968	0.505413	0.484487
528	2.34848	1.5357	1.39663		63.2436	0.269295	85.0009	0.361939	0.413557	0.376106	1.49357	0.505495	0.55583
529	2.34405	1.6071	1.3935		63.2809	0.269964	85.0255	0.36273	0.43386	0.376195	1.49022	0.505464	0.582943
530	2.33962	1.5446	1.39049		63.3182	0.270634	85.0363	0.363462	0.418021	0.376314	1.48701	0.50539	0.561403
531	2.33522	1.6292	1.38781		63.3555	0.271304	85.0319	0.364129	0.442009	0.376519	1.48414	0.505341	0.593238
532	2.33083	1.5998	1.38564		63.3928	0.271975	85.0155	0.364744	0.435106	0.37686	1.48182	0.505404	0.583517
533	2.32645	1.4286	1.38394		63.4301	0.272647	84.9912	0.365325	0.389503	0.377327	1.48	0.505588	0.521903
534	2.3221	1.5302	1.38265		63.4674	0.273319	84.9633	0.36589	0.418233	0.377905	1.47862	0.505898	0.559885
535	2.31776	1.5535	1.38169		63.5047	0.273992	84.9359	0.366457	0.425646	0.378572	1.4776	0.50633	0.569291
536	2.31343	1.6199	1.38099		63.542	0.274665	84.9132	0.367044	0.44493	0.37931	1.47685	0.506884	0.594575
537	2.30912	1.4989	1.38048		63.5792	0.275339	84.8994	0.367669	0.412706	0.3801	1.4763	0.50756	0.551099
538	2.30483	1.5738	1.38009		63.6165	0.276014	84.8988	0.368351	0.43439	0.380924	1.47588	0.508358	0.579711
539	2.30056	1.5352	1.37973		63.6538	0.276689	84.9155	0.369108	0.424773	0.381756	1.4755	0.50927	0.566655
540	2.2963	1.4825	1.37935		63.6976	0.277393	84.9536	0.369959	0.411235	0.382622	1.47509	0.510303	0.548465
541	2.29205	1.4251	1.37886		63.7413	0.278097	85.0157	0.370915	0.396316	0.383457	1.47457	0.51144	0.528592
542	2.28782	1.5511	1.3782		63.7851	0.278803	85.0969	0.371956	0.432451	0.384246	1.47386	0.512629	0.576941
543	2.28361	1.5256	1.37728		63.8288	0.279509	85.1905	0.373052	0.426418	0.384962	1.47288	0.513797	0.569128
544	2.27941	1.5792	1.37609		63.8726	0.280215	85.29	0.374175	0.442516	0.385601	1.47161	0.514899	0.590898
545	2.27523	1.5435	1.37467		63.9163	0.280923	85.3887	0.375297	0.433604	0.386176	1.47009	0.51591	0.579271
546	2.27106	1.5291	1.37309		63.9601	0.281631	85.48	0.376388	0.430642	0.386704	1.4684	0.516814	0.575534
547	2.26691	1.549	1.37142		64.0038	0.28234	85.5572	0.377418	0.437344	0.387206	1.46661	0.517598	0.58462
548	2.26277	1.5049	1.36972		64.0476	0.283049	85.6138	0.378358	0.425961	0.387698	1.46479	0.518244	0.569391
549	2.25865	1.552	1.36808		64.0913	0.283759	85.6432	0.379178	0.440394	0.388205	1.46304	0.518746	0.588485
550	2.25455	1.5399	1.36654		64.1351	0.28447	85.6386	0.379849	0.438056	0.38874	1.46139	0.519079	0.584929
551	2.25045	1.5382	1.36519		64.1788	0.285182	85.5954	0.380347	0.438667	0.389327	1.45995	0.519246	0.58505
552	2.24638	1.5697	1.36409		64.2226	0.285894	85.5159	0.380684	0.448768	0.389985	1.45877	0.519287	0.597559
553	2.24231	1.525	1.3633		64.2664	0.286607	85.4044	0.380876	0.437076	0.390732	1.45793	0.519248	0.580836
554	2.23827	1.5549	1.3629		64.3101	0.287321	85.2652	0.380943	0.446755	0.39159	1.4575	0.519187	0.592328
555	2.23423	1.5634	1.36295		64.3539	0.288035	85.1024	0.380902	0.450315	0.392578	1.45755	0.51915	0.595502
556	2.23022	1.5366	1.36346		64.3976	0.288751	84.9205	0.380772	0.443694	0.3937	1.4581	0.519168	0.585095
557	2.22621	1.4988	1.36441		64.4414	0.289466	84.7235	0.380573	0.433852	0.394951	1.45912	0.519257	0.570402
558	2.22222	1.531	1.36575		64.4851	0.290183	84.5159	0.380321	0.44427	0.396317	1.46055	0.519424	0.582272
559	2.21825	1.4483	1.36745		64.5289	0.2909	84.3017	0.380038	0.421311	0.397792	1.46237	0.519682	0.550409
560	2.21429	1.474	1.36947		64.4616	0.291117	84.0854	0.37974	0.429106	0.398676	1.46453	0.520043	0.559737
561	2.21034	1.5595	1.37177		64.3942	0.291332	83.8695	0.379442	0.454332	0.399641	1.46699	0.520507	0.59174
562	2.20641	1.4847	1.37433		64.3269	0.291546	83.6507	0.379126	0.432859	0.400681	1.46972	0.521045	0.562889
563	2.20249	1.5408	1.3771		64.2596	0.291759	83.4237	0.37877	0.449543	0.401782	1.47269	0.521605	0.58361
564	2.19858	1.5106	1.38004		64.1923	0.291972	83.1836	0.378351	0.441052	0.402932	1.47583	0.52214	0.571537
565	2.19469	1.5201	1.38313		64.125	0.292183	82.9253	0.377845	0.444147	0.404127	1.47913	0.522609	0.574362
566	2.19081	1.4374	1.38631		64.0577	0.292393	82.6436	0.377228	0.420285	0.405347	1.48254	0.522955	0.542228
567	2.18695	1.532	1.38957		63.9904	0.292601	82.3337	0.376477	0.448265	0.40659	1.48602	0.523142	0.576763
568	2.1831	1.518	1.39285		63.9231	0.292809	81.9903	0.375569	0.444484	0.407839	1.48953	0.523111	0.570113
569	2.17926	1.4807	1.39612		63.8558	0.293016	81.6085	0.374478	0.433869	0.409085	1.49303	0.522816	0.554489
570	2.17544	1.4816	1.39936		63.7885	0.293221	81.1831	0.37318	0.434437	0.410322	1.49649	0.522214	0.552904
571	2.17163	1.4331	1.40251		63.7212	0.293426	80.7109	0.371661	0.420509	0.411533	1.49986	0.521258	0.532627
572	2.16783	1.5134	1.40555		63.6539	0.293629	80.1961	0.369937	0.444379	0.412711	1.50311	0.519965	0.559862
573	2.16405	1.5198	1.40843		63.5866	0.293832	79.6445	0.368035	0.446565	0.413841	1.50619	0.518351	0.559339
574	2.16028	1.5119	1.41112		63.5193	0.294033	79.0621	0.365981	0.444548	0.414916	1.50907	0.516443	0.553327
575	2.15652	1.4777	1.41359		63.452	0.294233	78.4548	0.363802	0.434788	0.415925	1.51171	0.514268	0.537591
576	2.15278	1.4654	1.41579		63.3847	0.294432	77.8285	0.361526	0.431461	0.416854	1.51406	0.511845	0.52978
577	2.14905	1.5023	1.4177		63.3174	0.29463	77.1893	0.359179	0.442623	0.417697	1.5161	0.509208	0.539595
578	2.14533	1.456	1.41925		63.2501	0.294827	76.5429	0.356789	0.429268	0.418433	1.51776	0.506372	0.519484
579	2.14162	1.477	1.42039		63.1828	0.295023	75.8953	0.354382	0.435749	0.419047	1.51898	0.503361	0.523423
580	2.13793	1.502	1.42105		62.9746	0.294559	75.2526	0.351988	0.442427	0.418582	1.51969	0.500192	0.528686
581	2.13425	1.5089	1.42116		62.7664	0.294091	74.6184	0.349623	0.443754	0.41795	1.5198	0.496871	0.527547
582	2.13058	1.532	1.42067		62.5582	0.29362	73.9884	0.347268	0.449826	0.417137	1.51928	0.493353	0.532015
583	2.12693	1.5479	1.41952		62.35	0.293145	73.356	0.344891	0.45376	0.416126	1.51805	0.48958	0.533857
584	2.12329	1.5448	1.41763		62.1418	0.292668	72.7146	0.342462	0.452113	0.414895	1.51603	0.485485	0.529036
585	2.11966	1.5324	1.41494		61.9336	0.292187	72.0578	0.33995	0.447747	0.413426	1.51315	0.481009	0.520939
586	2.11604	1.4953	1.4114		61.7254	0.291702	71.3789	0.337323	0.436182	0.411708	1.50937	0.476098	0.504399
587	2.11244	1.5281	1.40693		61.5172	0.291214	70.6715	0.33455	0.445005	0.409718	1.50459	0.470688	0.511225
588	2.10884	1.4934	1.40148		61.309	0.290723	69.929	0.331599	0.434166	0.407443	1.49876	0.464729	0.49521
589	2.10526	1.2894	1.39501		61.1008	0.290229	69.1448	0.328438	0.374221	0.404872	1.49184	0.458174	0.423488
590	2.10169	1.3709	1.38763		60.8926	0.289731	68.3124	0.325035	0.397192	0.402039	1.48395	0.451028	0.44559
591	2.09814	1.4662	1.37949		60.6844	0.289229	67.4276	0.321368	0.424068	0.398989	1.47524	0.443325	0.47119
592	2.09459	1.4354	1.37077		60.4762	0.288725	66.4948	0.317459	0.414436	0.395775	1.46592	0.435163	0.455681
593	2.09106	1.4561	1.36163		60.2679	0.288217	65.521	0.313338	0.419673	0.392445	1.45614	0.426651	0.456252
594	2.08754	1.4491	1.35221		60.0597	0.287706	64.513	0.309038	0.416914	0.389038	1.44607	0.417884	0.447827
595	2.08403	1.4308	1.3427		59.8515	0.287191	63.4777	0.30459	0.410913	0.385611	1.4359	0.408974	0.435808
596	2.08054	1.4745	1.33324		59.6433	0.286673	62.4218	0.300028	0.422699	0.382204	1.42578	0.400009	0.442391
597	2.07705	1.4788	1.324		59.4351	0.286151	61.3524	0.295382	0.423161	0.378865	1.4159	0.391086	0.436811
598	2.07358	1.4607	1.31513		59.2269	0.285627	60.2761	0.290686	0.417215	0.375636	1.40642	0.38229	0.424605
599	2.07012	1.4606	1.30681		59.0187	0.285099	59.1998	0.285973	0.416415	0.37257	1.39752	0.373713	0.417693
600	2.06667	1.4753	1.29919		58.6626	0.283851	58.1305	0.281277	0.418766	0.368777	1.38937	0.365432	0.414967
601	2.06323	1.4579	1.29239		58.3065	0.282598	57.0731	0.27662	0.412	0.365227	1.3821	0.357501	0.403285
602	2.0598	1.436	1.28648		57.9503	0.28134	56.0256	0.271995	0.404004	0.361938	1.37578	0.349917	0.390585
603	2.05638	1.4664	1.28147		57.5942	0.280075	54.9842	0.267383	0.410702	0.358908	1.37042	0.342643	0.39209
604	2.05298	1.4921	1.27742		57.2381	0.278805	53.945	0.262764	0.416005	0.356151	1.36609	0.33566	0.392071
605	2.04959	1.4895	1.27436		56.8819	0.277529	52.9042	0.258121	0.413379	0.353672	1.36282	0.328939	0.384471
606	2.0462	1.4822	1.27233		56.5258	0.276247	51.8579	0.253434	0.409453	0.351477	1.36064	0.322452	0.375641
607	2.04283	1.4911	1.27137		56.1697	0.27496	50.8023	0.248685	0.409992	0.349575	1.35962	0.316171	0.370815
608	2.03947	1.4862	1.27151		55.8135	0.273666	49.7335	0.243855	0.406723	0.347969	1.35977	0.310064	0.362417
609	2.03612	1.4749	1.2728		55.4574	0.272367	48.6478	0.238923	0.401715	0.346669	1.36115	0.304102	0.352388
610	2.03279	1.4686	1.27527		55.1013	0.271063	47.5412	0.233872	0.398083	0.345678	1.36379	0.29825	0.343464
611	2.02946	1.4611	1.27896		54.7451	0.269752	46.4113	0.228688	0.394135	0.345002	1.36773	0.292483	0.334136
612	2.02614	1.4831	1.28391		54.389	0.268436	45.2608	0.223384	0.398117	0.344648	1.37303	0.286805	0.331301
613	2.02284	1.4621	1.28991		54.0328	0.267114	44.094	0.217981	0.390547	0.344553	1.37944	0.281176	0.31871
614	2.01954	1.4176	1.29656		53.6767	0.265786	42.9149	0.212498	0.376779	0.344608	1.38656	0.275516	0.301237
615	2.01626	1.4697	1.30345		53.3206	0.264453	41.7277	0.206956	0.388666	0.344701	1.39392	0.269757	0.304163
616	2.01299	1.431	1.31015		52.9644	0.263114	40.5365	0.201375	0.376516	0.344718	1.40109	0.263831	0.288167
617	2.00972	1.4128	1.31625		52.6083	0.261769	39.3455	0.195775	0.369827	0.344553	1.40761	0.257689	0.276592
618	2.00647	1.4664	1.32134		52.2522	0.260418	38.1587	0.190178	0.381877	0.344101	1.41306	0.25129	0.278877
619	2.00323	1.4733	1.32499		51.896	0.259062	36.9805	0.184604	0.381676	0.343254	1.41696	0.244599	0.271977
620	2	1.4739	1.32678		51.5267	0.257634	35.8148	0.179074	0.379726	0.341823	1.41887	0.237592	0.263937
621	1.99678	1.4802	1.3263		51.1575	0.2562	34.6652	0.173606	0.379227	0.339798	1.41836	0.230253	0.256971
622	1.99357	1.4269	1.32315		50.7882	0.25476	33.5328	0.168205	0.363517	0.337086	1.41499	0.22256	0.240012
623	1.99037	1.4165	1.3174		50.4189	0.253314	32.418	0.162874	0.35882	0.333716	1.40884	0.214571	0.230712
624	1.98718	1.4118	1.31005		50.0496	0.251862	31.3213	0.157617	0.355579	0.329952	1.40098	0.206486	0.222523
625	1.984	1.4026	1.30213		49.6803	0.250405	30.243	0.152435	0.351218	0.32606	1.39251	0.19849	0.213805
626	1.98083	1.4012	1.29469		49.311	0.248941	29.1837	0.147331	0.348816	0.322302	1.38456	0.190747	0.20644
627	1.97767	1.4417	1.2888		48.9417	0.247471	28.1438	0.142308	0.35678	0.318941	1.37826	0.183406	0.205165
628	1.97452	1.3631	1.28546		48.5724	0.245996	27.1236	0.137368	0.335317	0.316218	1.37469	0.176581	0.187246
629	1.97138	1.4114	1.28475		48.2031	0.244514	26.1238	0.132515	0.345108	0.31414	1.37393	0.170249	0.187032
630	1.96825	1.3924	1.28546		47.8339	0.243027	25.1446	0.127751	0.338391	0.312401	1.37469	0.164219	0.17788
631	1.96513	1.4161	1.28631		47.4646	0.241533	24.1866	0.123079	0.342035	0.310687	1.37559	0.158317	0.174292
632	1.96203	1.3638	1.28602		47.0953	0.240034	23.2502	0.118501	0.327358	0.308689	1.37528	0.152395	0.161612
633	1.95893	1.4508	1.28329		46.726	0.238529	22.3359	0.114021	0.346057	0.306101	1.37236	0.146322	0.165422
634	1.95584	1.4284	1.27696		46.3567	0.237017	21.444	0.109641	0.338556	0.302662	1.3656	0.140007	0.156612
635	1.95276	1.4458	1.26738		45.9874	0.2355	20.5752	0.105365	0.340486	0.298468	1.35535	0.133537	0.152336
636	1.94969	1.4128	1.25611		45.6181	0.233977	19.7297	0.101194	0.330562	0.293901	1.3433	0.127111	0.142968
637	1.94662	1.461	1.24473		45.2488	0.232448	18.9082	0.0971332	0.339606	0.289335	1.33113	0.120905	0.141912
638	1.94357	1.4707	1.23483		44.8795	0.230912	18.111	0.0931839	0.339603	0.285138	1.32054	0.115066	0.137046
639	1.94053	1.4646	1.22799		44.5103	0.229371	17.3386	0.0893495	0.335937	0.281666	1.31323	0.10972	0.130861
640	1.9375	1.434	1.22565		44.141	0.227824	16.5914	0.085633	0.3267	0.279233	1.31072	0.104956	0.122798
641	1.93448	1.4348	1.22787		43.629	0.225534	15.8698	0.0820369	0.323596	0.276926	1.3131	0.100731	0.117707
642	1.93146	1.4376	1.23385		43.117	0.223235	15.1739	0.0785616	0.320922	0.275438	1.31949	0.0969332	0.11294
643	1.92846	1.4525	1.24281		42.605	0.220927	14.5034	0.0752072	0.320897	0.274571	1.32908	0.0934683	0.109238
644	1.92547	1.4462	1.25395		42.093	0.218612	13.8583	0.0719738	0.316156	0.274128	1.34099	0.0902515	0.104088
645	1.92248	1.4567	1.26647		41.581	0.216288	13.2384	0.0688612	0.315067	0.273922	1.35438	0.0872106	0.10031
646	1.9195	1.415	1.27927		41.069	0.213956	12.6437	0.0658696	0.302748	0.273708	1.36807	0.084265	0.0932055
647	1.91654	1.4086	1.289		40.557	0.211616	12.074	0.062999	0.298082	0.272773	1.37847	0.0812057	0.0887403
648	1.91358	1.3952	1.29129		40.045	0.209267	11.5292	0.0602493	0.29197	0.270225	1.38092	0.0777993	0.0840598
649	1.91063	1.3519	1.28291		39.533	0.20691	11.0092	0.0576205	0.279722	0.265447	1.37196	0.0739219	0.0778972
650	1.90769	1.3594	1.26682		39.021	0.204545	10.5138	0.0551128	0.278059	0.259122	1.35475	0.069818	0.0749203
651	1.90476	1.4447	1.24803		38.509	0.202172	10.0429	0.052725	0.292078	0.252317	1.33466	0.0658024	0.0761718
652	1.90184	1.3871	1.23096		37.997	0.19979	9.59531	0.0504528	0.277129	0.245934	1.3164	0.0621053	0.069983
653	1.89893	1.4311	1.21671		37.485	0.197401	9.17	0.0482904	0.2825	0.240179	1.30116	0.0587554	0.0691084
654	1.89602	1.4153	1.20524		36.973	0.195003	8.76577	0.0462324	0.275987	0.235025	1.2889	0.0557211	0.0654327
655	1.89313	1.3499	1.19654		36.461	0.192596	8.38146	0.044273	0.259986	0.230449	1.27959	0.0529745	0.0597642
656	1.89024	1.1851	1.19059		35.949	0.190182	8.01591	0.0424067	0.225384	0.226428	1.27323	0.0504891	0.0502562
657	1.88737	1.2393	1.18736		35.4369	0.187759	7.66796	0.0406278	0.232689	0.222937	1.26978	0.0482398	0.0503501
658	1.8845	1.3855	1.18675		34.925	0.185328	7.33646	0.0389306	0.256771	0.219937	1.26912	0.0462009	0.0539383
659	1.88164	1.3905	1.18835		34.4676	0.183179	7.02024	0.0373092	0.25471	0.21768	1.27084	0.0443364	0.0518784
660	1.87879	1.3992	1.19167		34.0103	0.181023	6.71814	0.0357578	0.253287	0.215719	1.27439	0.0426115	0.0500324
661	1.87595	1.3933	1.19621		33.553	0.178859	6.42917	0.0342716	0.249204	0.213953	1.27924	0.0409961	0.0477507
662	1.87311	1.3819	1.20148		33.0956	0.176688	6.15303	0.0328492	0.244165	0.212287	1.28488	0.0394677	0.0453944
663	1.87029	1.3844	1.207		32.6383	0.17451	5.88957	0.0314902	0.241591	0.210633	1.29078	0.0380087	0.043595
664	1.86747	1.3967	1.21228		32.181	0.172324	5.63866	0.0301941	0.240685	0.208905	1.29643	0.0366037	0.0421721
665	1.86466	1.4214	1.21681		31.7236	0.170131	5.40016	0.0289605	0.241824	0.207017	1.30127	0.0352395	0.0411645
666	1.86186	1.4203	1.22012		31.2663	0.16793	5.17392	0.027789	0.238511	0.204895	1.30481	0.0339059	0.0394687
667	1.85907	1.4102	1.22171		30.809	0.165722	4.95982	0.026679	0.233702	0.202465	1.30651	0.032594	0.0376228
668	1.85629	1.415	1.22115		30.3517	0.163507	4.75771	0.0256302	0.231363	0.199667	1.30591	0.0312984	0.0362668
669	1.85351	1.4394	1.21866		29.8943	0.161285	4.56745	0.0246421	0.232153	0.196551	1.30325	0.0300304	0.0354699
670	1.85075	1.4196	1.21486		29.437	0.159055	4.38891	0.0237143	0.225794	0.193229	1.29919	0.0288095	0.0336648
671	1.84799	1.4169	1.21035		28.9797	0.156817	4.22185	0.0228457	0.222194	0.189804	1.29436	0.0276512	0.03237
672	1.84524	1.3972	1.20575		28.5223	0.154573	4.06574	0.0220337	0.215969	0.186376	1.28944	0.0265671	0.0307855
673	1.8425	1.4094	1.20166		28.065	0.152321	3.91991	0.021275	0.214681	0.183037	1.28507	0.0255653	0.029985
674	1.83976	1.4074	1.19871		27.6077	0.150061	3.78373	0.0205664	0.211196	0.17988	1.28191	0.0246532	0.0289452
675	1.83704	1.3958	1.19751		27.1503	0.147794	3.65656	0.0199047	0.206291	0.176985	1.28063	0.023836	0.0277829
676	1.83432	1.412	1.19865		26.693	0.14552	3.53776	0.0192865	0.205474	0.174427	1.28185	0.0231178	0.0272325
677	1.83161	1.3991	1.20277		26.2809	0.143485	3.42668	0.0187086	0.20075	0.172579	1.28626	0.0225021	0.0261752
678	1.82891	1.4066	1.21047		25.8687	0.141443	3.32269	0.0181676	0.198954	0.171213	1.29449	0.0219913	0.0255546
679	1.82622	1.3947	1.22235		25.4565	0.139395	3.22513	0.0176602	0.194414	0.17039	1.3072	0.0215869	0.0246307
680	1.82353	1.3969	1.23874		25.0444	0.13734	3.13338	0.0171831	0.19185	0.170129	1.32472	0.0212853	0.024003
681	1.82085	1.3915	1.25822		24.6322	0.135279	3.04686	0.0167332	0.18824	0.17021	1.34555	0.021054	0.0232842
682	1.81818	1.3981	1.27887		24.2201	0.13321	2.96535	0.0163094	0.186241	0.170359	1.36764	0.0208576	0.0228022
683	1.81552	1.383	1.29871		23.8079	0.131136	2.88868	0.015911	0.18136	0.170307	1.38886	0.0206638	0.022005
684	1.81287	1.3739	1.3158		23.3958	0.129054	2.81672	0.0155374	0.177307	0.169809	1.40713	0.0204441	0.0213468
685	1.81022	1.3748	1.32819		22.9836	0.126966	2.74929	0.0151876	0.174553	0.168635	1.42038	0.020172	0.0208799
686	1.80758	1.3438	1.33416		22.5715	0.124871	2.68626	0.0148611	0.167802	0.166598	1.42677	0.0198271	0.0199703
687	1.80495	0.96824	1.33295		22.1593	0.12277	2.62747	0.014557	0.11887	0.163646	1.42547	0.0194038	0.0140947
688	1.80233	1.1206	1.32405		21.7471	0.120662	2.57276	0.0142747	0.135213	0.159762	1.41595	0.0189004	0.0159962
689	1.79971	1.1278	1.30694		21.335	0.118547	2.52198	0.0140133	0.133697	0.154934	1.39766	0.0183145	0.0158042
690	1.7971	1.1821	1.28111		20.9228	0.116425	2.47498	0.0137721	0.137627	0.149154	1.37003	0.0176435	0.01628
691	1.7945	1.2333	1.24604		20.5107	0.114297	2.4316	0.0135503	0.140963	0.142419	1.33253	0.0168842	0.0167116
692	1.79191	1.2689	1.20327		20.0985	0.112163	2.39164	0.0133469	0.142323	0.134962	1.28679	0.0160599	0.0169359
693	1.78932	1.2609	1.16047		19.6864	0.110021	2.35489	0.0131608	0.138726	0.127677	1.24102	0.0152727	0.0165944
694	1.78674	1.2464	1.12644		19.2742	0.107873	2.32115	0.012991	0.134453	0.121513	1.20463	0.0146335	0.0161919
695	1.78417	1.2714	1.10652		18.8621	0.105719	2.29021	0.0128363	0.134411	0.11698	1.18333	0.0142036	0.01632
696	1.78161	1.2684	1.09587		18.4499	0.103558	2.26187	0.0126957	0.131352	0.113486	1.17194	0.0139128	0.0161032
697	1.77905	1.3403	1.08775		18.0378	0.10139	2.23592	0.012568	0.135893	0.110287	1.16325	0.0136709	0.0168449
698	1.7765	1.3192	1.07722		17.7336	0.0998232	2.21216	0.0124523	0.131687	0.107531	1.15199	0.0134139	0.0164271
699	1.77396	1.2918	1.06472		17.4295	0.0982518	2.19038	0.0123474	0.126922	0.104611	1.13862	0.0131465	0.0159504
700	1.77143	1.2823	1.05166		17.1254	0.0966755	2.17037	0.0122521	0.123967	0.10167	1.12466	0.012885	0.0157109
701	1.7689	1.2659	1.03948		16.8213	0.0950943	2.15195	0.0121655	0.12038	0.0988487	1.11163	0.0126458	0.0154003
702	1.76638	1.2674	1.02964		16.5171	0.0935083	2.13497	0.0120867	0.118512	0.0962798	1.10111	0.0124449	0.0153187
703	1.76387	1.2747	1.02359		16.213	0.0919173	2.11931	0.0120151	0.117167	0.0940856	1.09464	0.0122986	0.0153157
704	1.76136	1.3078	1.02284		15.9089	0.0903214	2.10484	0.0119501	0.118122	0.0923843	1.09384	0.012223	0.0156283
705	1.75887	1.3214	1.02905		15.6048	0.0887206	2.09144	0.0118908	0.117235	0.0912979	1.10048	0.0122363	0.0157126
706	1.75637	1.3144	1.04385		15.3006	0.0871149	2.07898	0.0118368	0.114504	0.0909349	1.11631	0.0123558	0.0155583
707	1.75389	1.309	1.06794		14.9965	0.0855043	2.06734	0.0117872	0.111925	0.0913134	1.14207	0.012588	0.0154294
708	1.75141	1.3048	1.10038		14.6924	0.0838888	2.05639	0.0117413	0.109458	0.0923095	1.17676	0.0129199	0.0153201
709	1.74894	1.3095	1.14		14.3883	0.0822683	2.04601	0.0116986	0.10773	0.0937859	1.21913	0.0133364	0.0153193
710	1.74648	1.3175	1.18182		14.0841	0.080643	2.03607	0.0116581	0.106247	0.0953055	1.26385	0.0137778	0.0153596
711	1.74402	1.3155	1.21429		13.78	0.0790128	2.02646	0.0116195	0.103941	0.0959444	1.29858	0.0141094	0.0152854
712	1.74157	1.3071	1.22537		13.4759	0.0773777	2.0172	0.0115826	0.10114	0.0948163	1.31042	0.014193	0.0151397
713	1.73913	1.2918	1.21268		13.1718	0.0757376	2.00829	0.0115477	0.0978378	0.0918455	1.29685	0.0140036	0.0149173
714	1.73669	1.3029	1.18862		12.8676	0.0740927	1.99977	0.0115148	0.0965353	0.088068	1.27112	0.0136867	0.0150026
715	1.73427	1.2587	1.15861		12.5635	0.0724428	1.99166	0.0114842	0.0911838	0.083933	1.23903	0.0133057	0.0144551
716	1.73184	1.2716	1.12515		12.2594	0.0707881	1.98397	0.0114558	0.0900141	0.0796472	1.20325	0.0128895	0.0145672
717	1.72943	1.1071	1.09076		11.9553	0.0691284	1.97674	0.01143	0.0765321	0.0754025	1.16647	0.0124674	0.0126542
718	1.72702	1.0296	1.05797		11.6511	0.0674638	1.96998	0.0114068	0.0694608	0.0713747	1.13141	0.0120681	0.0117445
719	1.72462	0.92318	1.02929		11.347	0.0657944	1.96372	0.0113864	0.06074	0.0677215	1.10073	0.0117199	0.0105117
720	1.72222	0.9855	1.00697		11.0429	0.06412	1.95799	0.011369	0.0631903	0.0645669	1.07687	0.0114482	0.0112041
721	1.71983	1.0861	0.99175		10.7388	0.0624407	1.95277	0.0113544	0.0678169	0.0619256	1.06059	0.0112607	0.012332
722	1.71745	1.2407	0.9839		10.4346	0.0607565	1.948	0.0113424	0.0753806	0.0597783	1.05219	0.0111598	0.0140725
723	1.71508	1.1444	0.98368		10.1305	0.0590674	1.94356	0.0113322	0.0675968	0.0581035	1.05196	0.0111473	0.0129686
724	1.71271	1.0555	0.99134		9.82639	0.0573734	1.93935	0.0113233	0.0605577	0.0568766	1.06015	0.0112252	0.0119517
725	1.71034	1.038	1.00714		9.52226	0.0556745	1.93527	0.0113151	0.0577902	0.056072	1.07705	0.0113959	0.0117451
726	1.70799	1.0813	1.03081		9.21814	0.0539707	1.93121	0.0113069	0.0583585	0.0556336	1.10236	0.0116553	0.0122262
727	1.70564	1.085	1.05996		8.91402	0.052262	1.92707	0.0112982	0.0567043	0.0553956	1.13353	0.0119757	0.0122586
728	1.7033	1.04	1.09168		8.71898	0.0511888	1.92274	0.0112883	0.0532364	0.0558818	1.16746	0.0123233	0.0117399
729	1.70096	1.0466	1.12305		8.52394	0.0501125	1.91811	0.0112766	0.0524478	0.0562789	1.201	0.0126642	0.0118021
730	1.69863	1.1285	1.15115		8.3289	0.049033	1.91309	0.0112625	0.0553338	0.0564444	1.23105	0.0129649	0.0127098
731	1.69631	1.0703	1.17308		8.13386	0.0479504	1.90759	0.0112456	0.0513213	0.0562497	1.25451	0.0131919	0.0120361
732	1.69399	1.1534	1.18542		7.93882	0.0468647	1.90163	0.0112258	0.0540537	0.0555543	1.2677	0.0133072	0.0129478
733	1.69168	1.1962	1.18335		7.74379	0.0457758	1.89522	0.0112032	0.054757	0.0541687	1.26549	0.0132573	0.0134013
734	1.68937	1.2357	1.1618		7.54875	0.0446837	1.88842	0.0111782	0.0552157	0.0519135	1.24244	0.0129869	0.0138129
735	1.68707	1.2178	1.12144		7.35371	0.0435885	1.88125	0.011151	0.0530821	0.0488819	1.19928	0.0125051	0.0135796
736	1.68478	1.2059	1.08012		7.15867	0.0424902	1.87374	0.0111216	0.0512389	0.0458945	1.15509	0.0120126	0.0134115
737	1.6825	1.2039	1.05882		6.96363	0.0413887	1.86593	0.0110902	0.0498278	0.0438232	1.13231	0.0117426	0.0133515
738	1.68022	1.2269	1.06693		6.76859	0.040284	1.85785	0.0110572	0.0494245	0.0429803	1.14099	0.0117973	0.0135661
739	1.67794	1.1905	1.08806		6.57355	0.0391763	1.84953	0.0110226	0.0466393	0.0426261	1.16358	0.0119933	0.0131224
740	1.67568	1.2195	1.10236		6.37852	0.0380653	1.84102	0.0109867	0.0464207	0.0419617	1.17888	0.0121113	0.0133983
741	1.67341	1.2148	1.09805		6.18348	0.0369513	1.83233	0.0109496	0.0448884	0.0405743	1.17427	0.0120233	0.0133016
742	1.67116	1.2153	1.08137		5.98844	0.035834	1.8235	0.0109116	0.0435491	0.0387499	1.15643	0.0117995	0.0132609
743	1.66891	1.2405	1.06097		5.7934	0.0347137	1.81457	0.0108728	0.0430623	0.0368302	1.13461	0.0115357	0.0134877
744	1.66667	1.2503	1.04258		5.59836	0.0335902	1.80558	0.0108335	0.0419978	0.0350204	1.11495	0.0112948	0.0135451
745	1.66443	1.2497	1.02697		5.40332	0.0324635	1.79654	0.0107937	0.0405697	0.0333391	1.09825	0.0110848	0.0134889
746	1.6622	1.247	1.01444		5.20829	0.0313337	1.7875	0.0107538	0.0390731	0.0317862	1.08485	0.0109091	0.01341
747	1.65997	1.2477	1.00529		5.01325	0.0302008	1.77849	0.010714	0.0376815	0.0303605	1.07507	0.0107706	0.0133678
748	1.65775	1.2401	0.99983		4.81821	0.0290647	1.76954	0.0106743	0.0360431	0.0290597	1.06923	0.0106725	0.0132372
749	1.65554	1.2357	0.99834		4.62317	0.0279254	1.76069	0.0106351	0.0345075	0.0278791	1.06764	0.0106175	0.0131418
750	1.65333	1.2341	1.00027		4.42813	0.0267831	1.75197	0.0105966	0.033053	0.0267903	1.0697	0.0105995	0.0130773
751	1.65113	1.2286	1.00399		4.23309	0.0256375		0	0.0314983	0.0257398	1.07368	0	0
752	1.64894	1.233	1.00782		4.13167	0.0250566		0	0.0308947	0.0252525	1.07777	0	0
753	1.64675	1.2266	1.01007		4.03023	0.0244739		0	0.0300197	0.0247204	1.08018	0	0
754	1.64456	1.242	1.00904		3.92881	0.0238897		0	0.029671	0.0241056	1.07908	0	0
755	1.64238	1.2383	1.00323		3.82738	0.0233038		0	0.0288571	0.0233791	1.07287	0	0
756	1.64021	1.2232	0.99524		3.72595	0.0227163		0	0.0277865	0.0226081	1.06432	0	0
757	1.63804	1.2221	0.99183		3.62452	0.0221271		0	0.0270416	0.0219463	1.06067	0	0
758	1.63588	1.2295	0.99991		3.52309	0.0215363		0	0.0264789	0.0215344	1.06932	0	0
759	1.63373	1.1945	1.02641		3.42166	0.0209439		0	0.0250175	0.021497	1.09765	0	0
760	1.63158	0.26604	1.07826		3.32024	0.0203498		0	0.00541387	0.0219424	1.1531	0	0
761	1.62943	0.15396	1.16327		3.21881	0.0197541		0	0.00304135	0.0229794	1.24401	0	0
762	1.6273	0.68766	1.30244		3.11738	0.0191568		0	0.0131734	0.0249506	1.39284	0	0
763	1.62516	0.37952	1.48939		3.01595	0.0185578		0	0.00704306	0.0276398	1.59277	0	0
764	1.62304	0.53878	1.61444		2.91452	0.0179572		0	0.00967499	0.0289909	1.7265	0	0
765	1.62092	0.68601	1.63233		2.81309	0.017355		0	0.0119057	0.028329	1.74563	0	0
766	1.6188	0.81461	1.54802		2.71166	0.0167511		0	0.0136456	0.025931	1.65547	0	0
767	1.61669	0.97417	1.37507		2.61024	0.0161456		0	0.0157285	0.0222013	1.47052	0	0
768	1.61458	1.1138	1.18561		2.5088	0.0155384		0	0.0173067	0.0184225	1.2679	0	0
769	1.61248	1.1278	1.04277		2.40738	0.0149296		0	0.0168376	0.0155682	1.11515	0	0
770	1.61039	1.1608	0.94857		2.30595	0.0143192		0	0.0166217	0.0135828	1.01441	0	0
771	1.6083	1.1686	0.89137		2.20452	0.0137071		0	0.0160181	0.0122181	0.953241	0	0
772	1.60622	1.1778	0.85599		2.10309	0.0130934		0	0.0154215	0.0112079	0.915405	0	0
773	1.60414	1.1771	0.82901		2.00167	0.0124781		0	0.014688	0.0103445	0.886553	0	0
774	1.60207	1.1771	0.8067		1.90023	0.0118611		0	0.0139617	0.00956837	0.862694	0	0
775	1.6	1.1771	0.78857		1.79881	0.0112425		0	0.0132336	0.00886553	0.843306	0	0
776	1.59794	1.1798	0.77413		1.75118	0.010959		0	0.0129294	0.00848368	0.827863	0	0
777	1.59588	1.1727	0.76291		1.70355	0.0106747		0	0.0125182	0.0081438	0.815865	0	0
778	1.59383	1.1713	0.7544		1.65592	0.0103896		0	0.0121693	0.00783789	0.806764	0	0
779	1.59178	1.1765	0.74814		1.60829	0.0101037		0	0.011887	0.00755898	0.800069	0	0
780	1.58974	1.1636	0.74363		1.56066	0.00981707		0	0.0114231	0.00730027	0.795246	0	0
781	1.58771	1.1607	0.74039		1.51303	0.00952967		0	0.0110611	0.00705567	0.791782	0	0
782	1.58568	1.1662	0.73794		1.4654	0.00924147		0	0.0107774	0.00681965	0.789161	0	0
783	1.58365	1.1614	0.73579		1.41777	0.00895253		0	0.0103975	0.00658718	0.786862	0	0
784	1.58163	1.1536	0.73349		1.37014	0.00866283		0	0.00999344	0.0063541	0.784403	0	0
785	1.57962	1.1586	0.73374		1.32251	0.00837236		0	0.00970021	0.00614313	0.78467	0	0
786	1.57761	1.1592	0.74452		1.27488	0.00808112		0	0.00936763	0.00601655	0.796198	0	0
787	1.5756	1.145	0.77404		1.22725	0.00778911		0	0.00891853	0.00602908	0.827767	0	0
788	1.5736	1.1305	0.81864		1.17963	0.00749633		0	0.00847461	0.0061368	0.875463	0	0
789	1.57161	1.1257	0.85925		1.132	0.00720279		0	0.00810818	0.006189	0.918892	0	0
790	1.56962	1.091	0.87647		1.08437	0.00690848		0	0.00753715	0.00605507	0.937307	0	0
791	1.56764	1.1058	0.867		1.03674	0.0066134		0	0.00731309	0.00573382	0.92718	0	0
792	1.56566	1.0953	0.84366		0.989111	0.00631755		0	0.00691961	0.00532986	0.90222	0	0
793	1.56368	1.0875	0.81954		0.941482	0.00602093		0	0.00654776	0.00493439	0.876425	0	0
794	1.56171	1.0972	0.80133		0.893854	0.00572355		0	0.00627988	0.00458645	0.856951	0	0
795	1.55975	1.0932	0.79083		0.846218	0.00542535		0	0.005931	0.00429053	0.845723	0	0
796	1.55779	1.0742	0.78938		0.79859	0.00512643		0	0.00550681	0.0040467	0.844172	0	0
797	1.55583	1.0913	0.79472		0.750961	0.00482674		0	0.00526742	0.00383591	0.849883	0	0
798	1.55388	1.1121	0.80251		0.703332	0.00452628		0	0.00503368	0.00363239	0.858213	0	0
799	1.55194	1.0905	0.80838		0.655704	0.00422506		0	0.00460742	0.00341545	0.864491	0	0
800	1.55	1.0725	0.80794		0.608075	0.00392306		0	0.00420748	0.0031696	0.86402	0	0
801	1.54806	1.0843	0.79682		0.560446	0.0036203		0	0.00392549	0.00288473	0.852128	0	0
802	1.54613	1.0856	0.77222		0.54472	0.00352311		0	0.00382469	0.00272062	0.825821	0	0
803	1.54421	1.0657	0.73993		0.529001	0.00342571		0	0.00365078	0.00253478	0.79129	0	0
804	1.54229	1.0782	0.70857		0.513275	0.00332801		0	0.00358826	0.00235813	0.757753	0	0
805	1.54037	1.0545	0.68681		0.49755	0.00323006		0	0.0034061	0.00221844	0.734482	0	0
806	1.53846	1.0974	0.68256		0.481831	0.0031319		0	0.00343695	0.00213771	0.729937	0	0
807	1.53656	1.0859	0.69271		0.466105	0.00303344		0	0.00329401	0.00210129	0.740792	0	0
808	1.53465	1.0821	0.70568		0.450379	0.00293473		0	0.00317567	0.00207098	0.754662	0	0
809	1.53276	1.0548	0.71099		0.434653	0.00283576		0	0.00299116	0.0020162	0.760341	0	0
810	1.53086	1.0559	0.70796		0.418934	0.00273659		0	0.00288956	0.00193739	0.7571	0	0
811	1.52898	1.0533	0.70029		0.403209	0.00263711		0	0.00277767	0.00184674	0.748898	0	0
812	1.52709	1.0268	0.69163		0.387483	0.00253739		0	0.00260539	0.00175493	0.739637	0	0
813	1.52522	1.0086	0.68525		0.371764	0.00243745		0	0.00245841	0.00167026	0.732814	0	0
814	1.52334	0.90356	0.68427		0.356038	0.00233722		0	0.00211182	0.00159929	0.731766	0	0
815	1.52147	0.89523	0.69141		0.340312	0.00223673		0	0.00200239	0.0015465	0.739402	0	0
816	1.51961	0.83216	0.70818		0.324593	0.00213603		0	0.00177752	0.00151269	0.757336	0	0
817	1.51775	0.85183	0.73592		0.308867	0.00203504		0	0.00173351	0.00149762	0.787001	0	0
818	1.51589	0.82259	0.79472		0.293142	0.00193379		0	0.00159072	0.00153682	0.849883	0	0
819	1.51404	0.90519	0.94645		0.277416	0.00183229		0	0.00165857	0.00173417	1.01214	0	0
820	1.5122	0.86188	1.26098		0.261697	0.00173058		0	0.00149155	0.00218222	1.34851	0	0
821	1.51035	0.99764	1.8993		0.245971	0.00162857		0	0.00162472	0.00309314	2.03113	0	0
822	1.50852	0.95157	2.99676		0.230245	0.0015263		0	0.00145239	0.00457397	3.20477	0	0
823	1.50668	0.67271	4.13029		0.214526	0.00142383		0	0.000957825	0.00588083	4.41698	0	0
824	1.50485	0.93506	4.87749		0.1988	0.00132106		0	0.00123527	0.00644346	5.21604	0	0
825	1.50303	0.96935	5.0448		0.171627	0.00114188		0	0.00110688	0.00576054	5.39497	0	0
826	1.50121	0.93381	4.71284		0.16522	0.00110058		0	0.00102773	0.00518684	5.03996	0	0
827	1.4994	0.98465	4.06082		0.158812	0.00105917		0	0.00104292	0.00430111	4.34269	0	0
828	1.49758	0.84979	3.34028		0.152404	0.00101767		0	0.000864803	0.00339929	3.57213	0	0
829	1.49578	0.9293	2.78877		0.147803	0.000988137		0	0.000918276	0.00275569	2.98234	0	0
830	1.49398	0.91601	2.359		0.143196	0.000958489		0	0.000877986	0.00226108	2.52274	0	0
831	1.49218	0.92392	1.93214		0.138595	0.000928811		0	0.000858147	0.00179459	2.06625	0	0
832	1.49038	0.89426	1.51608		0.133988	0.000899014		0	0.000803953	0.00136298	1.62131	0	0
833	1.4886	0.9565	1.35452		0.129387	0.000869187		0	0.000831378	0.00117733	1.44854	0	0
834	1.48681	0.93412	1.38427		0.124779	0.000839242		0	0.000783953	0.00116174	1.48035	0	0
835	1.48503	1.0032	1.44431		0.120179	0.000809267		0	0.000811856	0.00116883	1.54456	0	0
836	1.48325	0.97234	1.44766		0.115578	0.000779217		0	0.000757664	0.00112804	1.54814	0	0
837	1.48148	1.0092	1.31941		0.11097	0.000749049		0	0.000755941	0.000988303	1.41099	0	0
838	1.47971	0.99901	1.0912		0.106369	0.000718851		0	0.000718139	0.00078441	1.16694	0	0
839	1.47795	1.0013	0.87665		0.101762	0.000688535		0	0.00068943	0.000603604	0.937499	0	0
840	1.47619	1.0157	0.7745		0.0971611	0.000658188		0	0.000668522	0.000509767	0.828259	0	0
841	1.47444	1.0101	0.75769		0.0925537	0.000627723		0	0.000634063	0.00047562	0.810282	0	0
842	1.47268	0.99703	0.74284		0.0879528	0.000597228		0	0.000595454	0.000443645	0.794402	0	0
843	1.47094	1.0053	0.66771		0.0833519	0.000566659		0	0.000569662	0.000378364	0.714057	0	0
844	1.46919	0.98631	0.5558		0.0787446	0.000535971		0	0.000528634	0.000297893	0.594379	0	0
845	1.46746	1.0165	0.45181		0.0741437	0.000505253		0	0.00051359	0.000228278	0.483171	0	0
846	1.46572	1.0187	0.38165		0.0695363	0.000474417		0	0.000483289	0.000181061	0.408141	0	0
847	1.46399	0.9917	0.33944		0.0649354	0.000443551		0	0.000439869	0.000150559	0.363001	0	0
848	1.46226	0.99217	0.31618		0.060328	0.000412566		0	0.000409335	0.000130445	0.338126	0	0
849	1.46054	0.98596	0.3029		0.0557271	0.000381551		0	0.000376194	0.000115572	0.323925	0	0
850	1.45882	0.89372	0.29259		0.0511262	0.000350462		0	0.000313215	0.000102542	0.312899	0	0
851	1.45711	0.97493	0.28409		0.0489709	0.000336083		0	0.000327657	9.54778e-05	0.303809	0	0
852	1.4554	0.96927	0.27735		0.0468221	0.000321713		0	0.000311827	8.92272e-05	0.296601	0	0
853	1.45369	0.96486	0.27231		0.0446733	0.000307309		0	0.00029651	8.36834e-05	0.291211	0	0
854	1.45199	0.85112	0.26889		0.0425245	0.00029287		0	0.000249268	7.87499e-05	0.287554	0	0
855	1.45029	0.913	0.26705		0.0403757	0.000278397		0	0.000254176	7.43459e-05	0.285586	0	0
856	1.4486	0.97317	0.2667		0.0382269	0.000263889		0	0.000256809	7.03792e-05	0.285212	0	0
857	1.44691	0.99166	0.2678		0.0360781	0.000249346		0	0.000247267	6.67749e-05	0.286388	0	0
858	1.44522	0.99196	0.27028		0.0339228	0.000234724		0	0.000232837	6.34412e-05	0.289041	0	0
859	1.44354	0.99171	0.27408		0.031774	0.000220112		0	0.000218287	6.03283e-05	0.293104	0	0
860	1.44186	0.98816	0.27912		0.0296252	0.000205465		0	0.000203032	5.73494e-05	0.298494	0	0
861	1.44019	0.98679	0.28536		0.0274764	0.000190784		0	0.000188263	5.4442e-05	0.305167	0	0
862	1.43852	0.99449	0.29272		0.0253276	0.000176067		0	0.000175097	5.15385e-05	0.313038	0	0
863	1.43685	1.0005	0.30114		0.0242822	0.000168996		0	0.000169081	5.08916e-05	0.322043	0	0
864	1.43519	0.97916	0.31057		0.0232368	0.000161908		0	0.000158534	5.02839e-05	0.332127	0	0
865	1.43353	0.96324	0.32093		0.0221979	0.000154848		0	0.000149156	4.96955e-05	0.343206	0	0
866	1.43187	0.849	0.33217		0.0211526	0.000147727		0	0.00012542	4.90704e-05	0.355226	0	0
867	1.43022	0.91546	0.34422		0.0201136	0.000140633		0	0.000128744	4.84088e-05	0.368113	0	0
868	1.42857	0.9592	0.35702		0.0190683	0.000133478		0	0.000128032	4.76543e-05	0.381801	0	0
869	1.42693	0.94956	0.3705		0.0180229	0.000126306		0	0.000119935	4.67963e-05	0.396217	0	0
870	1.42529	0.96755	0.38461		0.016984	0.000119162		0	0.000115295	4.58309e-05	0.411306	0	0
871	1.42365	0.95387	0.39933		0.0159386	0.000111956		0	0.000106791	4.47074e-05	0.427048	0	0
872	1.42202	0.96686	0.41682		0.0148933	0.000104733		0	0.000101262	4.36549e-05	0.445752	0	0
873	1.42039	0.95721	0.44207		0.0138543	9.75391e-05		0	9.33654e-05	4.31191e-05	0.472755	0	0
874	1.41876	0.94042	0.48023		0.0132413	9.333e-05		0	8.77694e-05	4.48198e-05	0.513563	0	0
875	1.41714	0.92687	0.53648		0.0126347	8.91565e-05		0	8.26365e-05	4.78307e-05	0.573718	0	0
876	1.41553	0.95277	0.61597		0.0120282	8.49733e-05		0	8.096e-05	5.2341e-05	0.658725	0	0
877	1.41391	0.95615	0.74022		0.0114216	8.07802e-05		0	7.7238e-05	5.97951e-05	0.7916	0	0
878	1.4123	0.95237	0.99611		0.010815	7.65774e-05		0	7.293e-05	7.62795e-05	1.06525	0	0
879	1.41069	0.93656	1.48524		0.0102085	7.23648e-05		0	6.7774e-05	0.000107479	1.58833	0	0
880	1.40909	0.93957	2.18346		0.00960189	6.81425e-05		0	6.40246e-05	0.000148786	2.33502	0	0
881	1.40749	0.90861	2.85341		0.00899532	6.39103e-05		0	5.80696e-05	0.000182362	3.05147	0	0
882	1.4059	0.93245	3.24388		0.00838875	5.96684e-05		0	5.56378e-05	0.000193557	3.46904	0	0
883	1.4043	0.92927	3.20646		0.00808547	5.75763e-05		0	5.3504e-05	0.000184616	3.42902	0	0
884	1.40271	0.93305	2.77006		0.00778863	5.55254e-05		0	5.1808e-05	0.000153809	2.96233	0	0
885	1.40113	0.94423	2.13784		0.0074918	5.34697e-05		0	5.04877e-05	0.00011431	2.28623	0	0
886	1.39955	0.90752	1.5395		0.00718851	5.13631e-05		0	4.6613e-05	7.90735e-05	1.64636	0	0
887	1.39797	0.91062	1.11942		0.00689168	4.92978e-05		0	4.48915e-05	5.51849e-05	1.19712	0	0
888	1.3964	0.92228	0.89976		0.00659485	4.72276e-05		0	4.35571e-05	4.24935e-05	0.962214	0	0
889	1.39483	0.93455	0.80932		0.00629802	4.51527e-05		0	4.21975e-05	3.6543e-05	0.865496	0	0
890	1.39326	0.92393	0.77495		0.00599473	4.30267e-05		0	3.97537e-05	3.33435e-05	0.82874	0	0
891	1.39169	0.92584	0.82523		0.0056979	4.09422e-05		0	3.79059e-05	3.37867e-05	0.88251	0	0
892	1.39013	0.90881	0.99793		0.00540107	3.88528e-05		0	3.53098e-05	3.87724e-05	1.0672	0	0
893	1.38858	0.87327	1.21441		0.00509778	3.67122e-05		0	3.20597e-05	4.45837e-05	1.2987	0	0
894	1.38702	0.8513	1.3879		0.00480095	3.46133e-05		0	2.94663e-05	4.80398e-05	1.48424	0	0
895	1.38547	0.81357	1.46631		0.00450411	3.25095e-05		0	2.64488e-05	4.76691e-05	1.56809	0	0
896	1.38393	0.76253	1.41804		0.00420083	3.03544e-05		0	2.31461e-05	4.30437e-05	1.51647	0	0
897	1.38239	0.66566	1.23551		0.003904	2.8241e-05		0	1.87989e-05	3.4892e-05	1.32127	0	0
898	1.38085	0.7178	1.00609		0.00360716	2.61228e-05		0	1.8751e-05	2.62819e-05	1.07592	0	0
899	1.37931	0.54871	0.8398		0.00331033	2.39999e-05		0	1.3169e-05	2.01551e-05	0.898092	0	0
900	1.37778	0.7426	0.80322		0.00300704	2.18253e-05		0	1.62075e-05	1.75305e-05	0.858973	0	0
901	1.37625	0.59933	0.90657		0.00271021	1.96927e-05		0	1.18025e-05	1.78529e-05	0.969496	0	0
902	1.37472	0.66791	1.14631		0.00263278	1.91513e-05		0	1.27914e-05	2.19534e-05	1.22588	0	0
903	1.3732	0.68889	1.41622		0.0025618	1.86557e-05		0	1.28517e-05	2.64205e-05	1.51452	0	0
904	1.37168	0.84457	1.54949		0.00248436	1.81118e-05		0	1.52967e-05	2.8064e-05	1.65704	0	0
905	1.37017	0.81709	1.44388		0.00240693	1.75667e-05		0	1.43536e-05	2.53642e-05	1.5441	0	0
906	1.36865	0.77558	1.19135		0.00232949	1.70203e-05		0	1.32006e-05	2.02772e-05	1.27404	0	0
907	1.36714	0.63854	0.91778		0.00225851	1.65199e-05		0	1.05486e-05	1.51616e-05	0.981484	0	0
908	1.36564	0.65217	0.70388		0.00218108	1.59711e-05		0	1.04159e-05	1.12417e-05	0.752737	0	0
909	1.36414	0.70431	0.58518		0.00210364	1.5421e-05		0	1.08612e-05	9.02409e-06	0.625798	0	0
910	1.36264	0.62467	0.59264		0.00203266	1.49171e-05		0	9.31826e-06	8.84047e-06	0.633776	0	0
911	1.36114	0.66808	0.73792		0.00195522	1.43646e-05		0	9.5967e-06	1.05999e-05	0.78914	0	0
912	1.35965	0.68893	1.02389		0.00187779	1.38108e-05		0	9.5147e-06	1.41408e-05	1.09496	0	0
913	1.35816	0.62834	1.41904		0.00180036	1.32558e-05		0	8.32917e-06	1.88106e-05	1.51754	0	0
914	1.35667	0.62649	1.81527		0.00172937	1.27472e-05		0	7.98597e-06	2.31395e-05	1.94127	0	0
915	1.35519	0.67836	2.09371		0.00165194	1.21897e-05		0	8.26901e-06	2.55217e-05	2.23904	0	0
916	1.35371	0.57646	2.12684		0.0015745	1.1631e-05		0	6.70481e-06	2.47373e-05	2.27447	0	0
917	1.35224	0.73017	1.87746		0.00150352	1.11188e-05		0	8.11861e-06	2.08751e-05	2.00778	0	0
918	1.35076	0.59271	1.51402		0.00142609	1.05576e-05		0	6.25762e-06	1.59845e-05	1.61911	0	0
919	1.34929	0.73877	1.14825		0.00134865	9.99526e-06		0	7.3842e-06	1.14771e-05	1.22795	0	0
920	1.34783	0.74414	0.86218		0.00127767	9.4795e-06		0	7.05407e-06	8.17303e-06	0.922025	0	0
921	1.34636	0.78049	0.69282		0.00120024	8.91466e-06		0	6.9578e-06	6.17626e-06	0.74091	0	0
922	1.3449	0.70026	0.60103		0.0011228	8.34858e-06		0	5.84617e-06	5.01775e-06	0.642748	0	0
923	1.34345	0.74504	0.54195		0.00104537	7.78124e-06		0	5.79734e-06	4.21704e-06	0.579568	0	0
924	1.34199	0.7215	0.49553		0.000974386	7.26075e-06		0	5.23863e-06	3.59792e-06	0.529925	0	0
925	1.34054	0.7111	0.46083		0.000896951	6.69097e-06		0	4.75795e-06	3.0834e-06	0.492817	0	0
926	1.33909	0.70331	0.43743		0.000819516	6.11994e-06		0	4.30421e-06	2.67704e-06	0.467793	0	0
927	1.33765	0.78742	0.42486		0.000800158	5.98182e-06		0	4.71021e-06	2.54144e-06	0.45435	0	0
928	1.33621	0.58968	0.4227		0.000780799	5.8434e-06		0	3.44574e-06	2.47001e-06	0.45204	0	0
929	1.33477	0.55127	0.4305		0.000754988	5.65632e-06		0	3.11816e-06	2.43505e-06	0.460382	0	0
930	1.33333	0.4321	0.44781		0.000735629	5.51722e-06		0	2.38399e-06	2.47066e-06	0.478893	0	0
931	1.3319	0.40921	0.47421		0.00071627	5.3778e-06		0	2.20065e-06	2.55021e-06	0.507126	0	0
932	1.33047	0.30086	0.50934		0.000690459	5.18958e-06		0	1.56134e-06	2.64326e-06	0.544694	0	0
933	1.32905	0.24841	0.55682		0.0006711	5.04949e-06		0	1.25434e-06	2.81166e-06	0.59547	0	0
934	1.32762	0.1438	0.62536		0.000645289	4.86048e-06		0	6.98937e-07	3.03955e-06	0.668767	0	0
935	1.3262	0.25084	0.7215		0.000626239	4.72204e-06		0	1.18448e-06	3.40695e-06	0.77158	0	0
936	1.32479	0.16142	0.82544		0.000604527	4.5632e-06		0	7.36592e-07	3.76665e-06	0.882735	0	0
937	1.32337	0.16338	0.9019		0.000582815	4.40401e-06		0	7.19528e-07	3.97198e-06	0.964502	0	0
938	1.32196	0.20058	0.92535		0.000561103	4.24447e-06		0	8.51356e-07	3.92762e-06	0.98958	0	0
939	1.32055	0.39887	0.90977		0.000539392	4.08459e-06		0	1.62922e-06	3.71603e-06	0.972918	0	0
940	1.31915	0.47181	0.87588		0.00051768	3.92434e-06		0	1.85155e-06	3.43726e-06	0.936676	0	0
941	1.31775	0.37195	0.84248		0.000495967	3.76375e-06		0	1.39993e-06	3.17089e-06	0.900958	0	0
942	1.31635	0.40532	0.82476		0.000474255	3.60281e-06		0	1.46029e-06	2.97145e-06	0.882008	0	0
943	1.31495	0.27834	0.82348		0.000452543	3.44152e-06		0	9.57913e-07	2.83402e-06	0.880639	0	0
944	1.31356	0.28579	0.83583		0.000430832	3.27988e-06		0	9.37358e-07	2.74142e-06	0.893846	0	0
945	1.31217	0.36821	0.85897		0.00040912	3.11789e-06		0	1.14804e-06	2.67817e-06	0.918592	0	0
946	1.31078	0.19461	0.88969		0.000387408	2.95555e-06		0	5.75179e-07	2.62952e-06	0.951445	0	0
947	1.3094	0.37112	0.92325		0.000365696	2.79286e-06		0	1.03648e-06	2.5785e-06	0.987334	0	0
948	1.30802	0.27423	0.95453		0.000343984	2.62981e-06		0	7.21174e-07	2.51024e-06	1.02079	0	0
949	1.30664	0.49396	0.97841		0.000322273	2.46642e-06		0	1.21832e-06	2.41317e-06	1.04632	0	0
950	1.30526	0.14726	0.98546		0.000300561	2.30268e-06		0	3.39093e-07	2.2692e-06	1.05386	0	0
951	1.30389	0.48378	0.94556		0.000278849	2.13859e-06		0	1.03461e-06	2.02216e-06	1.01119	0	0
952	1.30252	0.26891	0.85897		0.000276036	2.11925e-06		0	5.69887e-07	1.82037e-06	0.918592	0	0
953	1.30115	0.34362	0.75533		0.000273224	2.09986e-06		0	7.21554e-07	1.58609e-06	0.807759	0	0
954	1.29979	0.42411	0.66229		0.000270412	2.08043e-06		0	8.8233e-07	1.37785e-06	0.70826	0	0
955	1.29843	0.34117	0.58697		0.0002676	2.06095e-06		0	7.03135e-07	1.20972e-06	0.627712	0	0
956	1.29707	0.32821	0.52731		0.000264788	2.04143e-06		0	6.70017e-07	1.07647e-06	0.563911	0	0
957	1.29572	0.27067	0.48121		0.000261976	2.02186e-06		0	5.47257e-07	9.72939e-07	0.514611	0	0
958	1.29436	0.46101	0.44669		0.000259163	2.00225e-06		0	9.23055e-07	8.94383e-07	0.477695	0	0
959	1.29301	0.37385	0.42297		0.000256352	1.98259e-06		0	7.41192e-07	8.38577e-07	0.452329	0	0
960	1.29167	0.42066	0.40998		0.00025354	1.96289e-06		0	8.25708e-07	8.04745e-07	0.438437	0	0
961	1.29032	0.4612	0.40765		0.000250728	1.94314e-06		0	8.96175e-07	7.9212e-07	0.435946	0	0
962	1.28898	0.44174	0.41594		0.000247915	1.92334e-06		0	8.49618e-07	7.99995e-07	0.444811	0	0
963	1.28764	0.50503	0.43479		0.000245103	1.9035e-06		0	9.61326e-07	8.27624e-07	0.464969	0	0
964	1.28631	0.4586	0.46412		0.000242291	1.88362e-06		0	8.63827e-07	8.74224e-07	0.496335	0	0
965	1.28497	0.50374	0.50362		0.000239479	1.86369e-06		0	9.38813e-07	9.3859e-07	0.538577	0	0
966	1.28364	0.50275	0.55008		0.000236667	1.84371e-06		0	9.26925e-07	1.01419e-06	0.588262	0	0
967	1.28232	0.5024	0.59861		0.000233855	1.82369e-06		0	9.16221e-07	1.09168e-06	0.64016	0	0
968	1.28099	0.6521	0.6443		0.000231042	1.80362e-06		0	1.17614e-06	1.16207e-06	0.689022	0	0
969	1.27967	0.68622	0.68238		0.00022823	1.78351e-06		0	1.22388e-06	1.21703e-06	0.729745	0	0
970	1.27835	0.63461	0.7132		0.000225418	1.76335e-06		0	1.11904e-06	1.25762e-06	0.762704	0	0
971	1.27703	0.71397	0.7438		0.000222606	1.74315e-06		0	1.24455e-06	1.29655e-06	0.795428	0	0
972	1.27572	0.68765	0.78167		0.000219794	1.7229e-06		0	1.18475e-06	1.34674e-06	0.835927	0	0
973	1.27441	0.60648	0.83429		0.000216982	1.70261e-06		0	1.0326e-06	1.42047e-06	0.892199	0	0
974	1.2731	0.57529	0.90915		0.00021417	1.68227e-06		0	9.67793e-07	1.52944e-06	0.972255	0	0
975	1.27179	0.58987	1.01809		0.000211358	1.66189e-06		0	9.80297e-07	1.69195e-06	1.08876	0	0
976	1.27049	0.57191	1.19647		0.000208546	1.64146e-06		0	9.38765e-07	1.96395e-06	1.27952	0	0
977	1.26919	0.63864	1.46967		0.000205733	1.62098e-06		0	1.03522e-06	2.38231e-06	1.57168	0	0
978	1.26789	0.61509	1.82302		0.000202921	1.60046e-06		0	9.84427e-07	2.91767e-06	1.94956	0	0
979	1.2666	0.63815	2.21651		0.000200109	1.57989e-06		0	1.00821e-06	3.50185e-06	2.37036	0	0
980	1.26531	0.60468	2.50247		0.000197297	1.55928e-06		0	9.42867e-07	3.90206e-06	2.67617	0	0
981	1.26402	0.71338	2.52202		0.000198703	1.572e-06		0	1.12143e-06	3.96461e-06	2.69708	0	0
982	1.26273	0.69218	2.30097		0.000200109	1.58474e-06		0	1.09692e-06	3.64643e-06	2.46068	0	0
983	1.26144	0.66865	1.9478		0.000201516	1.5975e-06		0	1.06817e-06	3.11161e-06	2.083	0	0
984	1.26016	0.73732	1.57024		0.000202922	1.61028e-06		0	1.18729e-06	2.52853e-06	1.67923	0	0
985	1.25888	0.68817	1.27487		0.000204328	1.62309e-06		0	1.11696e-06	2.06923e-06	1.36336	0	0
986	1.25761	0.75083	1.11791		0.000205734	1.63592e-06		0	1.2283e-06	1.82881e-06	1.19551	0	0
987	1.25633	0.73928	1.07031		0.000207141	1.64877e-06		0	1.21891e-06	1.7647e-06	1.1446	0	0
988	1.25506	0.73462	1.09485		0.000208547	1.66165e-06		0	1.22068e-06	1.81926e-06	1.17085	0	0
989	1.25379	0.74906	1.16214		0.000209953	1.67454e-06		0	1.25433e-06	1.94606e-06	1.24281	0	0
990	1.25253	0.73227	1.2561		0.000211359	1.68746e-06		0	1.23568e-06	2.11962e-06	1.34329	0	0
991	1.25126	0.75358	1.36195		0.000212766	1.70041e-06		0	1.2814e-06	2.31587e-06	1.45648	0	0
992	1.25	0.75102	1.46487		0.000214172	1.71338e-06		0	1.28678e-06	2.50987e-06	1.56655	0	0
993	1.24874	0.73728	1.5498		0.000215578	1.72636e-06		0	1.27281e-06	2.67552e-06	1.65737	0	0
994	1.24748	0.7541	1.59748		0.000216984	1.73937e-06		0	1.31166e-06	2.77861e-06	1.70836	0	0
995	1.24623	0.75176	1.58635		0.00021839	1.7524e-06		0	1.31739e-06	2.77993e-06	1.69646	0	0
996	1.24498	0.74884	1.50534		0.000219797	1.76547e-06		0	1.32205e-06	2.65763e-06	1.60983	0	0
997	1.24373	0.73971	1.36593		0.000221203	1.77854e-06		0	1.31561e-06	2.42937e-06	1.46074	0	0
998	1.24248	0.73887	1.20089		0.000222609	1.79164e-06		0	1.32379e-06	2.15157e-06	1.28425	0	0
999	1.24124	0.73857	1.06725		0.000224015	1.80477e-06		0	1.33295e-06	1.92614e-06	1.14133	0	0
1000	1.24	0.73532	0.99168		0.000225422	1.81792e-06		0	1.33675e-06	1.80279e-06	1.06051	0	0
1001	1.23876	0.74442	0.93825		0.000226828	1.83109e-06		0	1.3631e-06	1.71802e-06	1.00338	0	0
1002	1.23752	0.72805	0.89096		0.000228234	1.84428e-06		0	1.34273e-06	1.64318e-06	0.952803	0	0
1003	1.23629	0.73442	0.84937		0.00022964	1.85749e-06		0	1.36418e-06	1.5777e-06	0.908326	0	0
1004	1.23506	0.72336	0.81319		0.000231047	1.87073e-06		0	1.35321e-06	1.52126e-06	0.869635	0	0
1005	1.23383	0.68174	0.78215		0.000232453	1.88399e-06		0	1.28439e-06	1.47357e-06	0.83644	0	0
1006	1.2326	0.71252	0.75592		0.000233859	1.89728e-06		0	1.35185e-06	1.43419e-06	0.808389	0	0
1007	1.23138	0.72753	0.73367			0		0	0	0	0.784595	0	0
1008	1.23016	0.72685	0.71434			0		0	0	0	0.763923	0	0
1009	1.22894	0.71972	0.69688			0		0	0	0	0.745251	0	0
1010	1.22772	0.71914	0.68024			0		0	0	0	0.727456	0	0
1011	1.22651	0.72278	0.66339			0		0	0	0	0.709437	0	0
1012	1.2253	0.71877	0.64588			0		0	0	0	0.690711	0	0
1013	1.22409	0.71761	0.62782			0		0	0	0	0.671398	0	0
1014	1.22288	0.72068	0.60937			0		0	0	0	0.651667	0	0
1015	1.22167	0.70817	0.59066			0		0	0	0	0.631659	0	0
1016	1.22047	0.71129	0.57185			0		0	0	0	0.611543	0	0
1017	1.21927	0.70337	0.55307			0		0	0	0	0.591459	0	0
1018	1.21807	0.71422	0.53447			0		0	0	0	0.571568	0	0
1019	1.21688	0.68878	0.5162			0		0	0	0	0.55203	0	0
1020	1.21569	0.69896	0.49839			0		0	0	0	0.532984	0	0
1021	1.2145	0.70175	0.48121			0		0	0	0	0.514611	0	0
1022	1.21331	0.6897	0.46478			0		0	0	0	0.497041	0	0
1023	1.21212	0.69508	0.44926			0		0	0	0	0.480444	0	0
1024	1.21094	0.69058	0.43479			0		0	0	0	0.464969	0	0
1025	1.20976	0.69753	0.42152			0		0	0	0	0.450778	0	0
1026	1.20858	0.69636	0.40959			0		0	0	0	0.43802	0	0
1027	1.2074	0.69305	0.39913			0		0	0	0	0.426834	0	0
1028	1.20623	0.69385	0.3902			0		0	0	0	0.417284	0	0
1029	1.20505	0.68628	0.3827			0		0	0	0	0.409264	0	0
1030	1.20388	0.69055	0.37651			0		0	0	0	0.402644	0	0
1031	1.20272	0.68736	0.37155			0		0	0	0	0.39734	0	0
1032	1.20155	0.68787	0.36769			0		0	0	0	0.393212	0	0
1033	1.20039	0.67613	0.36485			0		0	0	0	0.390175	0	0
1034	1.19923	0.68015	0.3629			0		0	0	0	0.388089	0	0
1035	1.19807	0.68234	0.36176			0		0	0	0	0.38687	0	0
1036	1.19691	0.68202	0.36131			0		0	0	0	0.386389	0	0
1037	1.19576	0.67497	0.36146			0		0	0	0	0.386549	0	0
1038	1.19461	0.67172	0.36209			0		0	0	0	0.387223	0	0
1039	1.19346	0.67636	0.3631			0		0	0	0	0.388303	0	0
1040	1.19231	0.6717	0.36439			0		0	0	0	0.389683	0	0
1041	1.19116	0.67176	0.36586			0		0	0	0	0.391255	0	0
1042	1.19002	0.672	0.36739			0		0	0	0	0.392891	0	0
1043	1.18888	0.66525	0.36889			0		0	0	0	0.394495	0	0
1044	1.18774	0.66833	0.37028			0		0	0	0	0.395982	0	0
1045	1.1866	0.66452	0.37154			0		0	0	0	0.397329	0	0
1046	1.18547	0.64714	0.37266			0		0	0	0	0.398527	0	0
1047	1.18434	0.65694	0.37362			0		0	0	0	0.399553	0	0
1048	1.18321	0.66274	0.37441			0		0	0	0	0.400398	0	0
1049	1.18208	0.65896	0.375			0		0	0	0	0.401029	0	0
1050	1.18095	0.65463	0.37539			0		0	0	0	0.401446	0	0
1051	1.17983	0.65521	0.37556			0		0	0	0	0.401628	0	0
1052	1.17871	0.65118	0.37549			0		0	0	0	0.401553	0	0
1053	1.17759	0.64919	0.37517			0		0	0	0	0.401211	0	0
1054	1.17647	0.64646	0.37458			0		0	0	0	0.40058	0	0
1055	1.17536	0.64847	0.3737			0		0	0	0	0.399639	0	0
1056	1.17424	0.64641	0.37253			0		0	0	0	0.398388	0	0
1057	1.17313	0.64482	0.37104			0		0	0	0	0.396794	0	0
1058	1.17202	0.63818	0.36922			0		0	0	0	0.394848	0	0
1059	1.17092	0.61875	0.36706			0		0	0	0	0.392538	0	0
1060	1.16981	0.63585	0.36457			0		0	0	0	0.389875	0	0
1061	1.16871	0.62121	0.36185			0		0	0	0	0.386967	0	0
1062	1.16761	0.63266	0.35901			0		0	0	0	0.383929	0	0
1063	1.16651	0.62239	0.35616			0		0	0	0	0.380882	0	0
1064	1.16541	0.63196	0.3534			0		0	0	0	0.37793	0	0
1065	1.16432	0.62913	0.35084			0		0	0	0	0.375192	0	0
1066	1.16323	0.61713	0.34859			0		0	0	0	0.372786	0	0
1067	1.16214	0.62032	0.34676			0		0	0	0	0.370829	0	0
1068	1.16105	0.61944	0.34545			0		0	0	0	0.369428	0	0
1069	1.15996	0.58626	0.34477			0		0	0	0	0.368701	0	0
1070	1.15888	0.60469	0.34483			0		0	0	0	0.368765	0	0
1071	1.1578	0.61661	0.34574			0		0	0	0	0.369738	0	0
1072	1.15672	0.61536	0.34761			0		0	0	0	0.371738	0	0
1073	1.15564	0.60363	0.35053			0		0	0	0	0.374861	0	0
1074	1.15456	0.62158	0.35463			0		0	0	0	0.379245	0	0
1075	1.15349	0.59252	0.36			0		0	0	0	0.384988	0	0
1076	1.15242	0.61471	0.36664			0		0	0	0	0.392089	0	0
1077	1.15135	0.60434	0.37426			0		0	0	0	0.400238	0	0
1078	1.15028	0.60321	0.38255			0		0	0	0	0.409103	0	0
1079	1.14921	0.60474	0.39119			0		0	0	0	0.418343	0	0
1080	1.14815	0.59722	0.39986			0		0	0	0	0.427615	0	0
1081	1.14709	0.58083	0.40825			0		0	0	0	0.436587	0	0
1082	1.14603	0.5894	0.41604			0		0	0	0	0.444918	0	0
1083	1.14497	0.59814	0.42292			0		0	0	0	0.452275	0	0
1084	1.14391	0.57852	0.42857			0		0	0	0	0.458318	0	0
1085	1.14286	0.5933	0.43266			0		0	0	0	0.462692	0	0
1086	1.1418	0.5541	0.43489			0		0	0	0	0.465076	0	0
1087	1.14075	0.56697	0.43494			0		0	0	0	0.46513	0	0
1088	1.13971	0.59317	0.4325			0		0	0	0	0.46252	0	0
1089	1.13866	0.57919	0.42723			0		0	0	0	0.456885	0	0
1090	1.13761	0.55573	0.41884			0		0	0	0	0.447912	0	0
1091	1.13657	0.58835	0.407			0		0	0	0	0.43525	0	0
1092	1.13553	0.58124	0.392			0		0	0	0	0.419209	0	0
1093	1.13449	0.51058	0.37541			0		0	0	0	0.401468	0	0
1094	1.13346	0.53965	0.35901			0		0	0	0	0.383929	0	0
1095	1.13242	0.52067	0.34456			0		0	0	0	0.368476	0	0
1096	1.13139	0.50323	0.33384			0		0	0	0	0.357012	0	0
1097	1.13036	0.57852	0.3286			0		0	0	0	0.351409	0	0
1098	1.12933	0.50291	0.33062			0		0	0	0	0.353569	0	0
1099	1.1283	0.50772	0.34167			0		0	0	0	0.365386	0	0
1100	1.12727	0.48577	0			0		0	0	0	0	0	0
1101	1.12625	0.49696	0			0		0	0	0	0	0	0
1102	1.12523	0.46883	0			0		0	0	0	0	0	0
1103	1.12421	0.46637	0			0		0	0	0	0	0	0
1104	1.12319	0.46765	0			0		0	0	0	0	0	0
1105	1.12217	0.50644	0			0		0	0	0	0	0	0
1106	1.12116	0.39792	0			0		0	0	0	0	0	0
1107	1.12014	0.48304	0			0		0	0	0	0	0	0
1108	1.11913	0.41565	0			0		0	0	0	0	0	0
1109	1.11812	0.41278	0			0		0	0	0	0	0	0
1110	1.11712	0.47899	0			0		0	0	0	0	0	0
1111	1.11611	0.33154	0			0		0	0	0	0	0	0
1112	1.11511	0.41357	0			0		0	0	0	0	0	0
1113	1.11411	0.2685	0			0		0	0	0	0	0	0
1114	1.11311	0.29985	0			0		0	0	0	0	0	0
1115	1.11211	0.24987	0			0		0	0	0	0	0	0
1116	1.11111	0.20136	0			0		0	0	0	0	0	0
1117	1.11012	0.079618	0			0		0	0	0	0	0	0
1118	1.10912	0.21753	0			0		0	0	0	0	0	0
1119	1.10813	0.11317	0			0		0	0	0	0	0	0
1120	1.10714	0.14189	0			0		0	0	0	0	0	0
1121	1.10616	0.18586	0			0		0	0	0	0	0	0
1122	1.10517	0.081686	0			0		0	0	0	0	0	0
1123	1.10419	0.12817	0			0		0	0	0	0	0	0
1124	1.1032	0.1087	0			0		0	0	0	0	0	0
1125	1.10222	0.14428	0			0		0	0	0	0	0	0
1126	1.10124	0.051589	0			0		0	0	0	0	0	0
1127	1.10027	0.15725	0			0		0	0	0	0	0	0
1128	1.09929	0.099224	0			0		0	0	0	0	0	0
1129	1.09832	0.10591	0			0		0	0	0	0	0	0
1130	1.09735	0.070574	0			0		0	0	0	0	0	0
1131	1.09637	0.2956	0			0		0	0	0	0	0	0
1132	1.09541	0.23411	0			0		0	0	0	0	0	0
1133	1.09444	0.15331	0			0		0	0	0	0	0	0
1134	1.09347	0.04174	0			0		0	0	0	0	0	0
1135	1.09251	0.015462	0			0		0	0	0	0	0	0
1136	1.09155	0.12876	0			0		0	0	0	0	0	0
1137	1.09059	0.28785	0			0		0	0	0	0	0	0
1138	1.08963	0.20329	0			0		0	0	0	0	0	0
1139	1.08867	0.2985	0			0		0	0	0	0	0	0
1140	1.08772	0.25599	0			0		0	0	0	0	0	0
1141	1.08677	0.19337	0			0		0	0	0	0	0	0
1142	1.08581	0.22479	0			0		0	0	0	0	0	0
1143	1.08486	0.31183	0			0		0	0	0	0	0	0
1144	1.08392	0.11326	0			0		0	0	0	0	0	0
1145	1.08297	0.14604	0			0		0	0	0	0	0	0
1146	1.08202	0.15764	0			0		0	0	0	0	0	0
1147	1.08108	0.059176	0			0		0	0	0	0	0	0
1148	1.08014	0.27113	0			0		0	0	0	0	0	0
1149	1.0792	0.21854	0			0		0	0	0	0	0	0
1150	1.07826	0.12164	0			0		0	0	0	0	0	0
1151	1.07732	0.2034	0			0		0	0	0	0	0	0
1152	1.07639	0.24762	0			0		0	0	0	0	0	0
1153	1.07546	0.23812	0			0		0	0	0	0	0	0
1154	1.07452	0.14248	0			0		0	0	0	0	0	0
1155	1.07359	0.31316	0			0		0	0	0	0	0	0
1156	1.07266	0.2809	0			0		0	0	0	0	0	0
1157	1.07174	0.31458	0			0		0	0	0	0	0	0
1158	1.07081	0.31171	0			0		0	0	0	0	0	0
1159	1.06989	0.33693	0			0		0	0	0	0	0	0
1160	1.06897	0.28648	0			0		0	0	0	0	0	0
1161	1.06804	0.34753	0			0		0	0	0	0	0	0
1162	1.06713	0.35002	0			0		0	0	0	0	0	0
1163	1.06621	0.46857	0			0		0	0	0	0	0	0
1164	1.06529	0.40188	0			0		0	0	0	0	0	0
1165	1.06438	0.3886	0			0		0	0	0	0	0	0
1166	1.06346	0.37494	0			0		0	0	0	0	0	0
1167	1.06255	0.40996	0			0		0	0	0	0	0	0
1168	1.06164	0.41954	0			0		0	0	0	0	0	0
1169	1.06074	0.4231	0			0		0	0	0	0	0	0
1170	1.05983	0.45873	0			0		0	0	0	0	0	0
1171	1.05892	0.44831	0			0		0	0	0	0	0	0
1172	1.05802	0.45483	0			0		0	0	0	0	0	0
1173	1.05712	0.45642	0			0		0	0	0	0	0	0
1174	1.05622	0.33692	0			0		0	0	0	0	0	0
1175	1.05532	0.4524	0			0		0	0	0	0	0	0
1176	1.05442	0.47679	0			0		0	0	0	0	0	0
1177	1.05353	0.47235	0			0		0	0	0	0	0	0
1178	1.05263	0.36	0			0		0	0	0	0	0	0
1179	1.05174	0.48371	0			0		0	0	0	0	0	0
1180	1.05085	0.44069	0			0		0	0	0	0	0	0
1181	1.04996	0.45514	0			0		0	0	0	0	0	0
1182	1.04907	0.32318	0			0		0	0	0	0	0	0
1183	1.04818	0.4387	0			0		0	0	0	0	0	0
1184	1.0473	0.41985	0			0		0	0	0	0	0	0
1185	1.04641	0.40741	0			0		0	0	0	0	0	0
1186	1.04553	0.47715	0			0		0	0	0	0	0	0
1187	1.04465	0.45575	0			0		0	0	0	0	0	0
1188	1.04377	0.33504	0			0		0	0	0	0	0	0
1189	1.04289	0.41569	0			0		0	0	0	0	0	0
1190	1.04202	0.46239	0			0		0	0	0	0	0	0
1191	1.04114	0.4466	0			0		0	0	0	0	0	0
1192	1.04027	0.47336	0			0		0	0	0	0	0	0
1193	1.0394	0.45434	0			0		0	0	0	0	0	0
1194	1.03853	0.4689	0			0		0	0	0	0	0	0
1195	1.03766	0.44696	0			0		0	0	0	0	0	0
1196	1.03679	0.43131	0			0		0	0	0	0	0	0
1197	1.03592	0.47715	0			0		0	0	0	0	0	0
1198	1.03506	0.43392	0			0		0	0	0	0	0	0
1199	1.0342	0.36489	0			0		0	0	0	0	0	0
1200	1.03333	0.44825	0			0		0	0	0	0	0	0
1201	1.03247	0.43708	0			0		0	0	0	0	0	0
1202	1.03161	0.43717	0			0		0	0	0	0	0	0
1203	1.03076	0.43409	0			0		0	0	0	0	0	0
1204	1.0299	0.36247	0			0		0	0	0	0	0	0
1205	1.02905	0.43692	0			0		0	0	0	0	0	0
1206	1.02819	0.48086	0			0		0	0	0	0	0	0
1207	1.02734	0.42986	0			0		0	0	0	0	0	0
1208	1.02649	0.43346	0			0		0	0	0	0	0	0
1209	1.02564	0.41428	0			0		0	0	0	0	0	0
1210	1.02479	0.45336	0			0		0	0	0	0	0	0
1211	1.02395	0.42232	0			0		0	0	0	0	0	0
1212	1.0231	0.42489	0			0		0	0	0	0	0	0
1213	1.02226	0.46956	0			0		0	0	0	0	0	0
1214	1.02142	0.43407	0			0		0	0	0	0	0	0
1215	1.02058	0.4278	0			0		0	0	0	0	0	0
1216	1.01974	0.4664	0			0		0	0	0	0	0	0
1217	1.0189	0.45528	0			0		0	0	0	0	0	0
1218	1.01806	0.45934	0			0		0	0	0	0	0	0
1219	1.01723	0.44663	0			0		0	0	0	0	0	0
1220	1.01639	0.45805	0			0		0	0	0	0	0	0
1221	1.01556	0.46531	0			0		0	0	0	0	0	0
1222	1.01473	0.45139	0			0		0	0	0	0	0	0
1223	1.0139	0.44406	0			0		0	0	0	0	0	0
1224	1.01307	0.44808	0			0		0	0	0	0	0	0
1225	1.01224	0.46236	0			0		0	0	0	0	0	0
1226	1.01142	0.46819	0			0		0	0	0	0	0	0
1227	1.01059	0.43304	0			0		0	0	0	0	0	0
1228	1.00977	0.46658	0			0		0	0	0	0	0	0
1229	1.00895	0.46721	0			0		0	0	0	0	0	0
1230	1.00813	0.46003	0			0		0	0	0	0	0	0
1231	1.00731	0.47203	0			0		0	0	0	0	0	0
1232	1.00649	0.46633	0			0		0	0	0	0	0	0
1233	1.00568	0.45397	0			0		0	0	0	0	0	0
1234	1.00486	0.47016	0			0		0	0	0	0	0	0
1235	1.00405	0.46504	0			0		0	0	0	0	0	0
1236	1.00324	0.46908	0			0		0	0	0	0	0	0
1237	1.00243	0.46339	0			0		0	0	0	0	0	0
1238	1.00162	0.46797	0			0		0	0	0	0	0	0
1239	1.00081	0.46272	0			0		0	0	0	0	0	0
1240	1	0.46077	0			0		0	0	0	0	0	0
1241	0.999194	0.46197	0			0		0	0	0	0	0	0
1242	0.99839	0.46247	0			0		0	0	0	0	0	0
1243	0.997586	0.45754	0			0		0	0	0	0	0	0
1244	0.996785	0.45528	0			0		0	0	0	0	0	0
1245	0.995984	0.45655	0			0		0	0	0	0	0	0
1246	0.995185	0.45945	0			0		0	0	0	0	0	0
1247	0.994387	0.45746	0			0		0	0	0	0	0	0
1248	0.99359	0.4586	0			0		0	0	0	0	0	0
1249	0.992794	0.45966	0			0		0	0	0	0	0	0
1250	0.992	0.45705	0			0		0	0	0	0	0	0
1251	0.991207	0.45258	0			0		0	0	0	0	0	0
1252	0.990415	0.45097	0			0		0	0	0	0	0	0
1253	0.989625	0.44773	0			0		0	0	0	0	0	0
1254	0.988836	0.44363	0			0		0	0	0	0	0	0
1255	0.988048	0.4507	0			0		0	0	0	0	0	0
1256	0.987261	0.44023	0			0		0	0	0	0	0	0
1257	0.986476	0.43532	0			0		0	0	0	0	0	0
1258	0.985692	0.44496	0			0		0	0	0	0	0	0
1259	0.984909	0.42725	0			0		0	0	0	0	0	0
1260	0.984127	0.4311	0			0		0	0	0	0	0	0
1261	0.983347	0.41146	0			0		0	0	0	0	0	0
1262	0.982567	0.39567	0			0		0	0	0	0	0	0
1263	0.981789	0.40019	0			0		0	0	0	0	0	0
1264	0.981013	0.37148	0			0		0	0	0	0	0	0
1265	0.980237	0.3957	0			0		0	0	0	0	0	0
1266	0.979463	0.38527	0			0		0	0	0	0	0	0
1267	0.97869	0.38822	0			0		0	0	0	0	0	0
1268	0.977918	0.37051	0			0		0	0	0	0	0	0
1269	0.977147	0.24652	0			0		0	0	0	0	0	0
1270	0.976378	0.38744	0			0		0	0	0	0	0	0
1271	0.97561	0.40825	0			0		0	0	0	0	0	0
1272	0.974843	0.40879	0			0		0	0	0	0	0	0
1273	0.974077	0.40625	0			0		0	0	0	0	0	0
1274	0.973312	0.40614	0			0		0	0	0	0	0	0
1275	0.972549	0.41233	0			0		0	0	0	0	0	0
1276	0.971787	0.41693	0			0		0	0	0	0	0	0
1277	0.971026	0.42001	0			0		0	0	0	0	0	0
1278	0.970266	0.42763	0			0		0	0	0	0	0	0
1279	0.969507	0.42456	0			0		0	0	0	0	0	0
1280	0.96875	0.42204	0			0		0	0	0	0	0	0
1281	0.967994	0.41335	0			0		0	0	0	0	0	0
1282	0.967239	0.37305	0			0		0	0	0	0	0	0
1283	0.966485	0.40733	0			0		0	0	0	0	0	0
1284	0.965732	0.42078	0			0		0	0	0	0	0	0
1285	0.964981	0.42399	0			0		0	0	0	0	0	0
1286	0.96423	0.42714	0			0		0	0	0	0	0	0
1287	0.963481	0.42213	0			0		0	0	0	0	0	0
1288	0.962733	0.41989	0			0		0	0	0	0	0	0
1289	0.961986	0.40936	0			0		0	0	0	0	0	0
1290	0.96124	0.41285	0			0		0	0	0	0	0	0
1291	0.960496	0.41786	0			0		0	0	0	0	0	0
1292	0.959752	0.39618	0			0		0	0	0	0	0	0
1293	0.95901	0.41257	0			0		0	0	0	0	0	0
1294	0.958269	0.40421	0			0		0	0	0	0	0	0
1295	0.957529	0.40514	0			0		0	0	0	0	0	0
1296	0.95679	0.38957	0			0		0	0	0	0	0	0
1297	0.956052	0.3713	0			0		0	0	0	0	0	0
1298	0.955316	0.39183	0			0		0	0	0	0	0	0
1299	0.95458	0.40852	0			0		0	0	0	0	0	0
1300	0.953846	0.35312	0			0		0	0	0	0	0	0
1301	0.953113	0.36228	0			0		0	0	0	0	0	0
1302	0.952381	0.39181	0			0		0	0	0	0	0	0
1303	0.95165	0.34621	0			0		0	0	0	0	0	0
1304	0.95092	0.30062	0			0		0	0	0	0	0	0
1305	0.950192	0.38382	0			0		0	0	0	0	0	0
1306	0.949464	0.38453	0			0		0	0	0	0	0	0
1307	0.948738	0.30594	0			0		0	0	0	0	0	0
1308	0.948012	0.34696	0			0		0	0	0	0	0	0
1309	0.947288	0.38413	0			0		0	0	0	0	0	0
1310	0.946565	0.30114	0			0		0	0	0	0	0	0
1311	0.945843	0.33366	0			0		0	0	0	0	0	0
1312	0.945122	0.33337	0			0		0	0	0	0	0	0
1313	0.944402	0.31352	0			0		0	0	0	0	0	0
1314	0.943683	0.28833	0			0		0	0	0	0	0	0
1315	0.942966	0.28581	0			0		0	0	0	0	0	0
1316	0.942249	0.32419	0			0		0	0	0	0	0	0
1317	0.941534	0.31217	0			0		0	0	0	0	0	0
1318	0.940819	0.33328	0			0		0	0	0	0	0	0
1319	0.940106	0.26855	0			0		0	0	0	0	0	0
1320	0.939394	0.25872	0			0		0	0	0	0	0	0
1321	0.938683	0.29866	0			0		0	0	0	0	0	0
1322	0.937973	0.30217	0			0		0	0	0	0	0	0
1323	0.937264	0.23279	0			0		0	0	0	0	0	0
1324	0.936556	0.26249	0			0		0	0	0	0	0	0
1325	0.935849	0.32224	0			0		0	0	0	0	0	0
1326	0.935143	0.28051	0			0		0	0	0	0	0	0
1327	0.934439	0.26625	0			0		0	0	0	0	0	0
1328	0.933735	0.2345	0			0		0	0	0	0	0	0
1329	0.933032	0.17759	0			0		0	0	0	0	0	0
1330	0.932331	0.22923	0			0		0	0	0	0	0	0
1331	0.93163	0.1448	0			0		0	0	0	0	0	0
1332	0.930931	0.14579	0			0		0	0	0	0	0	0
1333	0.930233	0.20304	0			0		0	0	0	0	0	0
1334	0.929535	0.16925	0			0		0	0	0	0	0	0
1335	0.928839	0.23117	0			0		0	0	0	0	0	0
1336	0.928144	0.18348	0			0		0	0	0	0	0	0
1337	0.92745	0.16454	0			0		0	0	0	0	0	0
1338	0.926756	0.17804	0			0		0	0	0	0	0	0
1339	0.926064	0.17681	0			0		0	0	0	0	0	0
1340	0.925373	0.16831	0			0		0	0	0	0	0	0
1341	0.924683	0.17039	0			0		0	0	0	0	0	0
1342	0.923994	0.17798	0			0		0	0	0	0	0	0
1343	0.923306	0.12711	0			0		0	0	0	0	0	0
1344	0.922619	0.075645	0			0		0	0	0	0	0	0
1345	0.921933	0.10904	0			0		0	0	0	0	0	0
1346	0.921248	0.058186	0			0		0	0	0	0	0	0
1347	0.920564	0.060119	0			0		0	0	0	0	0	0
1348	0.919881	0.0047451	0			0		0	0	0	0	0	0
1349	0.919199	0.016159	0			0		0	0	0	0	0	0
1350	0.918519	0.016025	0			0		0	0	0	0	0	0
1351	0.917839	0.0046298	0			0		0	0	0	0	0	0
1352	0.91716	0.0015164	0			0		0	0	0	0	0	0
1353	0.916482	9.6096e-05	0			0		0	0	0	0	0	0
1354	0.915805	0.00029009	0			0		0	0	0	0	0	0
1355	0.915129	3.6034e-06	0			0		0	0	0	0	0	0
1356	0.914454	4.807e-05	0			0		0	0	0	0	0	0
1357	0.91378	7.1786e-05	0			0		0	0	0	0	0	0
1358	0.913108	4.1948e-06	0			0		0	0	0	0	0	0
1359	0.912436	7.3439e-07	0			0		0	0	0	0	0	0
1360	0.911765	2.1404e-06	0			0		0	0	0	0	0	0
1361	0.911095	4.8133e-09	0			0		0	0	0	0	0	0
1362	0.910426	1.8076e-11	0			0		0	0	0	0	0	0
1363	0.909758	3.1563e-06	0			0		0	0	0	0	0	0
1364	0.909091	1.3589e-06	0			0		0	0	0	0	0	0
1365	0.908425	9.0764e-12	0			0		0	0	0	0	0	0
1366	0.90776	1.2791e-05	0			0		0	0	0	0	0	0
1367	0.907096	4.9764e-06	0			0		0	0	0	0	0	0
1368	0.906433	1.481e-13	0			0		0	0	0	0	0	0
1369	0.905771	5.1667e-07	0			0		0	0	0	0	0	0
1370	0.905109	2.92e-07	0			0		0	0	0	0	0	0
1371	0.904449	1.9731e-08	0			0		0	0	0	0	0	0
1372	0.90379	2.7498e-06	0			0		0	0	0	0	0	0
1373	0.903132	4.4401e-05	0			0		0	0	0	0	0	0
1374	0.902475	0.00017917	0			0		0	0	0	0	0	0
1375	0.901818	0.00032332	0			0		0	0	0	0	0	0
1376	0.901163	0.00025748	0			0		0	0	0	0	0	0
1377	0.900508	0.0001227	0			0		0	0	0	0	0	0
1378	0.899855	0.0011089	0			0		0	0	0	0	0	0
1379	0.899202	5.2164e-05	0			0		0	0	0	0	0	0
1380	0.898551	8.1587e-05	0			0		0	0	0	0	0	0
1381	0.8979	2.3716e-06	0			0		0	0	0	0	0	0
1382	0.89725	2.5672e-06	0			0		0	0	0	0	0	0
1383	0.896602	4.4017e-08	0			0		0	0	0	0	0	0
1384	0.895954	6.1689e-07	0			0		0	0	0	0	0	0
1385	0.895307	2.0899e-06	0			0		0	0	0	0	0	0
1386	0.894661	2.5215e-06	0			0		0	0	0	0	0	0
1387	0.894016	0.00019896	0			0		0	0	0	0	0	0
1388	0.893372	4.0262e-06	0			0		0	0	0	0	0	0
1389	0.892729	0.00058098	0			0		0	0	0	0	0	0
1390	0.892086	0.00049328	0			0		0	0	0	0	0	0
1391	0.891445	0.00034384	0			0		0	0	0	0	0	0
1392	0.890805	2.3782e-05	0			0		0	0	0	0	0	0
1393	0.890165	0.00011586	0			0		0	0	0	0	0	0
1394	0.889527	7.5526e-05	0			0		0	0	0	0	0	0
1395	0.888889	6.7136e-07	0			0		0	0	0	0	0	0
1396	0.888252	6.3215e-09	0			0		0	0	0	0	0	0
1397	0.887616	4.9057e-05	0			0		0	0	0	0	0	0
1398	0.886981	0.0012704	0			0		0	0	0	0	0	0
1399	0.886347	0.00081226	0			0		0	0	0	0	0	0
1400	0.885714	3.2466e-09	0			0		0	0	0	0	0	0
1401	0.885082	1.0528e-08	0			0		0	0	0	0	0	0
1402	0.884451	0.0018353	0			0		0	0	0	0	0	0
1403	0.88382	0.00238	0			0		0	0	0	0	0	0
1404	0.883191	0.00073892	0			0		0	0	0	0	0	0
1405	0.882562	3.6444e-07	0			0		0	0	0	0	0	0
1406	0.881935	0.0020448	0			0		0	0	0	0	0	0
1407	0.881308	0.00017457	0			0		0	0	0	0	0	0
1408	0.880682	0.0016493	0			0		0	0	0	0	0	0
1409	0.880057	0.00061919	0			0		0	0	0	0	0	0
1410	0.879433	0.00046653	0			0		0	0	0	0	0	0
1411	0.878809	0.0021142	0			0		0	0	0	0	0	0
1412	0.878187	0.0026396	0			0		0	0	0	0	0	0
1413	0.877565	0.023353	0			0		0	0	0	0	0	0
1414	0.876945	0.00036378	0			0		0	0	0	0	0	0
1415	0.876325	0.00018366	0			0		0	0	0	0	0	0
1416	0.875706	0.035565	0			0		0	0	0	0	0	0
1417	0.875088	0.011759	0			0		0	0	0	0	0	0
1418	0.874471	0.013559	0			0		0	0	0	0	0	0
1419	0.873855	0.0021442	0			0		0	0	0	0	0	0
1420	0.873239	0.0082718	0			0		0	0	0	0	0	0
1421	0.872625	0.0091637	0			0		0	0	0	0	0	0
1422	0.872011	0.046314	0			0		0	0	0	0	0	0
1423	0.871398	0.0092198	0			0		0	0	0	0	0	0
1424	0.870787	0.016975	0			0		0	0	0	0	0	0
1425	0.870175	0.02585	0			0		0	0	0	0	0	0
1426	0.869565	0.027792	0			0		0	0	0	0	0	0
1427	0.868956	0.049546	0			0		0	0	0	0	0	0
1428	0.868347	0.0045588	0			0		0	0	0	0	0	0
1429	0.86774	0.03802	0			0		0	0	0	0	0	0
1430	0.867133	0.061601	0			0		0	0	0	0	0	0
1431	0.866527	0.050156	0			0		0	0	0	0	0	0
1432	0.865922	0.0025194	0			0		0	0	0	0	0	0
1433	0.865318	0.035834	0			0		0	0	0	0	0	0
1434	0.864714	0.020962	0			0		0	0	0	0	0	0
1435	0.864111	0.021416	0			0		0	0	0	0	0	0
1436	0.86351	0.038351	0			0		0	0	0	0	0	0
1437	0.862909	0.02988	0			0		0	0	0	0	0	0
1438	0.862309	0.013263	0			0		0	0	0	0	0	0
1439	0.86171	0.051039	0			0		0	0	0	0	0	0
1440	0.861111	0.039601	0			0		0	0	0	0	0	0
1441	0.860514	0.0318	0			0		0	0	0	0	0	0
1442	0.859917	0.036317	0			0		0	0	0	0	0	0
1443	0.859321	0.045063	0			0		0	0	0	0	0	0
1444	0.858726	0.061791	0			0		0	0	0	0	0	0
1445	0.858131	0.049751	0			0		0	0	0	0	0	0
1446	0.857538	0.023095	0			0		0	0	0	0	0	0
1447	0.856945	0.036215	0			0		0	0	0	0	0	0
1448	0.856354	0.11569	0			0		0	0	0	0	0	0
1449	0.855763	0.10213	0			0		0	0	0	0	0	0
1450	0.855172	0.027412	0			0		0	0	0	0	0	0
1451	0.854583	0.011271	0			0		0	0	0	0	0	0
1452	0.853994	0.062361	0			0		0	0	0	0	0	0
1453	0.853407	0.081978	0			0		0	0	0	0	0	0
1454	0.85282	0.13759	0			0		0	0	0	0	0	0
1455	0.852234	0.06615	0			0		0	0	0	0	0	0
1456	0.851648	0.088509	0			0		0	0	0	0	0	0
1457	0.851064	0.117	0			0		0	0	0	0	0	0
1458	0.85048	0.13643	0			0		0	0	0	0	0	0
1459	0.849897	0.16307	0			0		0	0	0	0	0	0
1460	0.849315	0.085421	0			0		0	0	0	0	0	0
1461	0.848734	0.090276	0			0		0	0	0	0	0	0
1462	0.848153	0.1306	0			0		0	0	0	0	0	0
1463	0.847573	0.043225	0			0		0	0	0	0	0	0
1464	0.846995	0.15184	0			0		0	0	0	0	0	0
1465	0.846416	0.093383	0			0		0	0	0	0	0	0
1466	0.845839	0.065197	0			0		0	0	0	0	0	0
1467	0.845262	0.036054	0			0		0	0	0	0	0	0
1468	0.844687	0.076942	0			0		0	0	0	0	0	0
1469	0.844112	0.094845	0			0		0	0	0	0	0	0
1470	0.843537	0.049678	0			0		0	0	0	0	0	0
1471	0.842964	0.017848	0			0		0	0	0	0	0	0
1472	0.842391	0.046771	0			0		0	0	0	0	0	0
1473	0.841819	0.070198	0			0		0	0	0	0	0	0
1474	0.841248	0.097339	0			0		0	0	0	0	0	0
1475	0.840678	0.18463	0			0		0	0	0	0	0	0
1476	0.840108	0.068778	0			0		0	0	0	0	0	0
1477	0.83954	0.069736	0			0		0	0	0	0	0	0
1478	0.838972	0.06348	0			0		0	0	0	0	0	0
1479	0.838404	0.12001	0			0		0	0	0	0	0	0
1480	0.837838	0.060637	0			0		0	0	0	0	0	0
1481	0.837272	0.11529	0			0		0	0	0	0	0	0
1482	0.836707	0.05849	0			0		0	0	0	0	0	0
1483	0.836143	0.14859	0			0		0	0	0	0	0	0
1484	0.83558	0.13747	0			0		0	0	0	0	0	0
1485	0.835017	0.12503	0			0		0	0	0	0	0	0
1486	0.834455	0.1234	0			0		0	0	0	0	0	0
1487	0.833894	0.060629	0			0		0	0	0	0	0	0
1488	0.833333	0.09418	0			0		0	0	0	0	0	0
1489	0.832774	0.18973	0			0		0	0	0	0	0	0
1490	0.832215	0.17478	0			0		0	0	0	0	0	0
1491	0.831657	0.19778	0			0		0	0	0	0	0	0
1492	0.831099	0.16441	0			0		0	0	0	0	0	0
1493	0.830543	0.18157	0			0		0	0	0	0	0	0
1494	0.829987	0.20367	0			0		0	0	0	0	0	0
1495	0.829431	0.18253	0			0		0	0	0	0	0	0
1496	0.828877	0.16852	0			0		0	0	0	0	0	0
1497	0.828323	0.2285	0			0		0	0	0	0	0	0
1498	0.82777	0.18968	0			0		0	0	0	0	0	0
1499	0.827218	0.21759	0			0		0	0	0	0	0	0
1500	0.826667	0.25061	0			0		0	0	0	0	0	0
1501	0.826116	0.26552	0			0		0	0	0	0	0	0
1502	0.825566	0.23356	0			0		0	0	0	0	0	0
1503	0.825017	0.18493	0			0		0	0	0	0	0	0
1504	0.824468	0.16029	0			0		0	0	0	0	0	0
1505	0.82392	0.18402	0			0		0	0	0	0	0	0
1506	0.823373	0.25773	0			0		0	0	0	0	0	0
1507	0.822827	0.25514	0			0		0	0	0	0	0	0
1508	0.822281	0.24302	0			0		0	0	0	0	0	0
1509	0.821736	0.1869	0			0		0	0	0	0	0	0
1510	0.821192	0.27052	0			0		0	0	0	0	0	0
1511	0.820649	0.26474	0			0		0	0	0	0	0	0
1512	0.820106	0.26068	0			0		0	0	0	0	0	0
1513	0.819564	0.24239	0			0		0	0	0	0	0	0
1514	0.819022	0.22571	0			0		0	0	0	0	0	0
1515	0.818482	0.26573	0			0		0	0	0	0	0	0
1516	0.817942	0.25683	0			0		0	0	0	0	0	0
1517	0.817403	0.24929	0			0		0	0	0	0	0	0
1518	0.816864	0.25211	0			0		0	0	0	0	0	0
1519	0.816327	0.24437	0			0		0	0	0	0	0	0
1520	0.815789	0.2645	0			0		0	0	0	0	0	0
1521	0.815253	0.27505	0			0		0	0	0	0	0	0
1522	0.814717	0.26378	0			0		0	0	0	0	0	0
1523	0.814183	0.28004	0			0		0	0	0	0	0	0
1524	0.813648	0.27539	0			0		0	0	0	0	0	0
1525	0.813115	0.25884	0			0		0	0	0	0	0	0
1526	0.812582	0.26745	0			0		0	0	0	0	0	0
1527	0.81205	0.2622	0			0		0	0	0	0	0	0
1528	0.811518	0.27928	0			0		0	0	0	0	0	0
1529	0.810988	0.27244	0			0		0	0	0	0	0	0
1530	0.810458	0.25522	0			0		0	0	0	0	0	0
1531	0.809928	0.26973	0			0		0	0	0	0	0	0
1532	0.809399	0.27839	0			0		0	0	0	0	0	0
1533	0.808871	0.27714	0			0		0	0	0	0	0	0
1534	0.808344	0.26892	0			0		0	0	0	0	0	0
1535	0.807818	0.26686	0			0		0	0	0	0	0	0
1536	0.807292	0.27464	0			0		0	0	0	0	0	0
1537	0.806766	0.27336	0			0		0	0	0	0	0	0
1538	0.806242	0.27202	0			0		0	0	0	0	0	0
1539	0.805718	0.27295	0			0		0	0	0	0	0	0
1540	0.805195	0.26491	0			0		0	0	0	0	0	0
1541	0.804672	0.26904	0			0		0	0	0	0	0	0
1542	0.80415	0.26927	0			0		0	0	0	0	0	0
1543	0.803629	0.27208	0			0		0	0	0	0	0	0
1544	0.803109	0.2721	0			0		0	0	0	0	0	0
1545	0.802589	0.27705	0			0		0	0	0	0	0	0
1546	0.80207	0.27481	0			0		0	0	0	0	0	0
1547	0.801551	0.27309	0			0		0	0	0	0	0	0
1548	0.801034	0.26675	0			0		0	0	0	0	0	0
1549	0.800516	0.27342	0			0		0	0	0	0	0	0
1550	0.8	0.2699	0			0		0	0	0	0	0	0
1551	0.799484	0.27058	0			0		0	0	0	0	0	0
1552	0.798969	0.27182	0			0		0	0	0	0	0	0
1553	0.798455	0.27132	0			0		0	0	0	0	0	0
1554	0.797941	0.26474	0			0		0	0	0	0	0	0
1555	0.797428	0.26759	0			0		0	0	0	0	0	0
1556	0.796915	0.2631	0			0		0	0	0	0	0	0
1557	0.796403	0.27062	0			0		0	0	0	0	0	0
1558	0.795892	0.26848	0			0		0	0	0	0	0	0
1559	0.795382	0.26808	0			0		0	0	0	0	0	0
1560	0.794872	0.26568	0			0		0	0	0	0	0	0
1561	0.794363	0.27002	0			0		0	0	0	0	0	0
1562	0.793854	0.26756	0			0		0	0	0	0	0	0
1563	0.793346	0.26667	0			0		0	0	0	0	0	0
1564	0.792839	0.26264	0			0		0	0	0	0	0	0
1565	0.792332	0.26728	0			0		0	0	0	0	0	0
1566	0.791826	0.26245	0			0		0	0	0	0	0	0
1567	0.791321	0.26308	0			0		0	0	0	0	0	0
1568	0.790816	0.25722	0			0		0	0	0	0	0	0
1569	0.790312	0.25452	0			0		0	0	0	0	0	0
1570	0.789809	0.24175	0			0		0	0	0	0	0	0
1571	0.789306	0.23507	0			0		0	0	0	0	0	0
1572	0.788804	0.23775	0			0		0	0	0	0	0	0
1573	0.788303	0.23407	0			0		0	0	0	0	0	0
1574	0.787802	0.24145	0			0		0	0	0	0	0	0
1575	0.787302	0.23974	0			0		0	0	0	0	0	0
1576	0.786802	0.24678	0			0		0	0	0	0	0	0
1577	0.786303	0.21602	0			0		0	0	0	0	0	0
1578	0.785805	0.23516	0			0		0	0	0	0	0	0
1579	0.785307	0.23672	0			0		0	0	0	0	0	0
1580	0.78481	0.24464	0			0		0	0	0	0	0	0
1581	0.784314	0.2487	0			0		0	0	0	0	0	0
1582	0.783818	0.24195	0			0		0	0	0	0	0	0
1583	0.783323	0.24755	0			0		0	0	0	0	0	0
1584	0.782828	0.24904	0			0		0	0	0	0	0	0
1585	0.782334	0.25874	0			0		0	0	0	0	0	0
1586	0.781841	0.25569	0			0		0	0	0	0	0	0
1587	0.781348	0.25303	0			0		0	0	0	0	0	0
1588	0.780856	0.25107	0			0		0	0	0	0	0	0
1589	0.780365	0.23233	0			0		0	0	0	0	0	0
1590	0.779874	0.24179	0			0		0	0	0	0	0	0
1591	0.779384	0.24197	0			0		0	0	0	0	0	0
1592	0.778894	0.25225	0			0		0	0	0	0	0	0
1593	0.778406	0.25833	0			0		0	0	0	0	0	0
1594	0.777917	0.25624	0			0		0	0	0	0	0	0
1595	0.777429	0.25823	0			0		0	0	0	0	0	0
1596	0.776942	0.24452	0			0		0	0	0	0	0	0
1597	0.776456	0.24692	0			0		0	0	0	0	0	0
1598	0.77597	0.25421	0			0		0	0	0	0	0	0
1599	0.775485	0.24202	0			0		0	0	0	0	0	0
1600	0.775	0.2381	0			0		0	0	0	0	0	0
1601	0.774516	0.22323	0			0		0	0	0	0	0	0
1602	0.774032	0.22413	0			0		0	0	0	0	0	0
1603	0.77355	0.22397	0			0		0	0	0	0	0	0
1604	0.773067	0.22842	0			0		0	0	0	0	0	0
1605	0.772586	0.23683	0			0		0	0	0	0	0	0
1606	0.772105	0.2414	0			0		0	0	0	0	0	0
1607	0.771624	0.23296	0			0		0	0	0	0	0	0
1608	0.771144	0.2299	0			0		0	0	0	0	0	0
1609	0.770665	0.22727	0			0		0	0	0	0	0	0
1610	0.770186	0.2176	0			0		0	0	0	0	0	0
1611	0.769708	0.2268	0			0		0	0	0	0	0	0
1612	0.769231	0.23076	0			0		0	0	0	0	0	0
1613	0.768754	0.23719	0			0		0	0	0	0	0	0
1614	0.768278	0.23838	0			0		0	0	0	0	0	0
1615	0.767802	0.24104	0			0		0	0	0	0	0	0
1616	0.767327	0.2305	0			0		0	0	0	0	0	0
1617	0.766852	0.23465	0			0		0	0	0	0	0	0
1618	0.766378	0.24352	0			0		0	0	0	0	0	0
1619	0.765905	0.241	0			0		0	0	0	0	0	0
1620	0.765432	0.23449	0			0		0	0	0	0	0	0
1621	0.76496	0.2343	0			0		0	0	0	0	0	0
1622	0.764488	0.23754	0			0		0	0	0	0	0	0
1623	0.764017	0.24246	0			0		0	0	0	0	0	0
1624	0.763547	0.24269	0			0		0	0	0	0	0	0
1625	0.763077	0.23782	0			0		0	0	0	0	0	0
1626	0.762608	0.23971	0			0		0	0	0	0	0	0
1627	0.762139	0.24078	0			0		0	0	0	0	0	0
1628	0.761671	0.24126	0			0		0	0	0	0	0	0
1629	0.761203	0.24137	0			0		0	0	0	0	0	0
1630	0.760736	0.23651	0			0		0	0	0	0	0	0
1631	0.76027	0.23806	0			0		0	0	0	0	0	0
1632	0.759804	0.23821	0			0		0	0	0	0	0	0
1633	0.759339	0.23267	0			0		0	0	0	0	0	0
1634	0.758874	0.23282	0			0		0	0	0	0	0	0
1635	0.75841	0.23367	0			0		0	0	0	0	0	0
1636	0.757946	0.23539	0			0		0	0	0	0	0	0
1637	0.757483	0.227	0			0		0	0	0	0	0	0
1638	0.757021	0.22007	0			0		0	0	0	0	0	0
1639	0.756559	0.22026	0			0		0	0	0	0	0	0
1640	0.756098	0.21511	0			0		0	0	0	0	0	0
1641	0.755637	0.2196	0			0		0	0	0	0	0	0
1642	0.755177	0.22082	0			0		0	0	0	0	0	0
1643	0.754717	0.21535	0			0		0	0	0	0	0	0
1644	0.754258	0.22355	0			0		0	0	0	0	0	0
1645	0.753799	0.21822	0			0		0	0	0	0	0	0
1646	0.753341	0.21749	0			0		0	0	0	0	0	0
1647	0.752884	0.22768	0			0		0	0	0	0	0	0
1648	0.752427	0.21655	0			0		0	0	0	0	0	0
1649	0.751971	0.21867	0			0		0	0	0	0	0	0
1650	0.751515	0.22526	0			0		0	0	0	0	0	0
1651	0.75106	0.20855	0			0		0	0	0	0	0	0
1652	0.750605	0.22373	0			0		0	0	0	0	0	0
1653	0.750151	0.22277	0			0		0	0	0	0	0	0
1654	0.749698	0.21583	0			0		0	0	0	0	0	0
1655	0.749245	0.22231	0			0		0	0	0	0	0	0
1656	0.748792	0.22101	0			0		0	0	0	0	0	0
1657	0.74834	0.22223	0			0		0	0	0	0	0	0
1658	0.747889	0.22487	0			0		0	0	0	0	0	0
1659	0.747438	0.2212	0			0		0	0	0	0	0	0
1660	0.746988	0.22332	0			0		0	0	0	0	0	0
1661	0.746538	0.22384	0			0		0	0	0	0	0	0
1662	0.746089	0.21908	0			0		0	0	0	0	0	0
1663	0.74564	0.22235	0			0		0	0	0	0	0	0
1664	0.745192	0.22098	0			0		0	0	0	0	0	0
1665	0.744745	0.21178	0			0		0	0	0	0	0	0
1666	0.744298	0.17884	0			0		0	0	0	0	0	0
1667	0.743851	0.21068	0			0		0	0	0	0	0	0
1668	0.743405	0.21459	0			0		0	0	0	0	0	0
1669	0.74296	0.21516	0			0		0	0	0	0	0	0
1670	0.742515	0.22168	0			0		0	0	0	0	0	0
1671	0.742071	0.21879	0			0		0	0	0	0	0	0
1672	0.741627	0.21147	0			0		0	0	0	0	0	0
1673	0.741184	0.21629	0			0		0	0	0	0	0	0
1674	0.740741	0.21575	0			0		0	0	0	0	0	0
1675	0.740299	0.2136	0			0		0	0	0	0	0	0
1676	0.739857	0.21145	0			0		0	0	0	0	0	0
1677	0.739416	0.21229	0			0		0	0	0	0	0	0
1678	0.738975	0.20915	0			0		0	0	0	0	0	0
1679	0.738535	0.21303	0			0		0	0	0	0	0	0
1680	0.738095	0.20558	0			0		0	0	0	0	0	0
1681	0.737656	0.19447	0			0		0	0	0	0	0	0
1682	0.737218	0.20366	0			0		0	0	0	0	0	0
1683	0.73678	0.20906	0			0		0	0	0	0	0	0
1684	0.736342	0.19797	0			0		0	0	0	0	0	0
1685	0.735905	0.21321	0			0		0	0	0	0	0	0
1686	0.735469	0.21026	0			0		0	0	0	0	0	0
1687	0.735033	0.20484	0			0		0	0	0	0	0	0
1688	0.734597	0.21013	0			0		0	0	0	0	0	0
1689	0.734162	0.20718	0			0		0	0	0	0	0	0
1690	0.733728	0.20523	0			0		0	0	0	0	0	0
1691	0.733294	0.19303	0			0		0	0	0	0	0	0
1692	0.732861	0.20708	0			0		0	0	0	0	0	0
1693	0.732428	0.21134	0			0		0	0	0	0	0	0
1694	0.731995	0.20477	0			0		0	0	0	0	0	0
1695	0.731563	0.20968	0			0		0	0	0	0	0	0
1696	0.731132	0.20922	0			0		0	0	0	0	0	0
1697	0.730701	0.18107	0			0		0	0	0	0	0	0
1698	0.730271	0.20739	0			0		0	0	0	0	0	0
1699	0.729841	0.20551	0			0		0	0	0	0	0	0
1700	0.729412	0.19975	0			0		0	0	0	0	0	0
1701	0.728983	0.2025	0			0		0	0	0	0	0	0
1702	0.728555	0.20396	0			0		0	0	0	0	0	0
1703	0.728127	0.20321	0			0		0	0	0	0	0	0
1704	0.7277	0.20083	0			0		0	0	0	0	0	0
1705	0.727273	0.19778	0			0		0	0	0	0	0	0
1706	0.726846	0.19488	0			0		0	0	0	0	0	0
1707	0.726421	0.19237	0			0		0	0	0	0	0	0
1708	0.725995	0.19031	0			0		0	0	0	0	0	0
1709	0.725571	0.18879	0			0		0	0	0	0	0	0
1710	0.725146	0.1879	0			0		0	0	0	0	0	0
1711	0.724722	0.18766	0			0		0	0	0	0	0	0
1712	0.724299	0.18793	0			0		0	0	0	0	0	0
1713	0.723876	0.18848	0			0		0	0	0	0	0	0
1714	0.723454	0.18912	0			0		0	0	0	0	0	0
1715	0.723032	0.18965	0			0		0	0	0	0	0	0
1716	0.722611	0.18988	0			0		0	0	0	0	0	0
1717	0.72219	0.18976	0			0		0	0	0	0	0	0
1718	0.721769	0.18925	0			0		0	0	0	0	0	0
1719	0.72135	0.18834	0			0		0	0	0	0	0	0
1720	0.72093	0.18698	0			0		0	0	0	0	0	0
1721	0.720511	0.1852	0			0		0	0	0	0	0	0
1722	0.720093	0.18318	0			0		0	0	0	0	0	0
1723	0.719675	0.18116	0			0		0	0	0	0	0	0
1724	0.719258	0.17938	0			0		0	0	0	0	0	0
1725	0.718841	0.17808	0			0		0	0	0	0	0	0
1726	0.718424	0.17739	0			0		0	0	0	0	0	0
1727	0.718008	0.17702	0			0		0	0	0	0	0	0
1728	0.717593	0.1766	0			0		0	0	0	0	0	0
1729	0.717178	0.17575	0			0		0	0	0	0	0	0
1730	0.716763	0.17407	0			0		0	0	0	0	0	0
1731	0.716349	0.17137	0			0		0	0	0	0	0	0
1732	0.715935	0.16811	0			0		0	0	0	0	0	0
1733	0.715522	0.16495	0			0		0	0	0	0	0	0
1734	0.71511	0.16255	0			0		0	0	0	0	0	0
1735	0.714697	0.16154	0			0		0	0	0	0	0	0
1736	0.714286	0.16233	0			0		0	0	0	0	0	0
1737	0.713874	0.16428	0			0		0	0	0	0	0	0
1738	0.713464	0.1665	0			0		0	0	0	0	0	0
1739	0.713053	0.16809	0			0		0	0	0	0	0	0
1740	0.712644	0.16818	0			0		0	0	0	0	0	0
1741	0.712234	0.16618	0			0		0	0	0	0	0	0
1742	0.711825	0.16282	0			0		0	0	0	0	0	0
1743	0.711417	0.15911	0			0		0	0	0	0	0	0
1744	0.711009	0.1561	0			0		0	0	0	0	0	0
1745	0.710602	0.15481	0			0		0	0	0	0	0	0
1746	0.710195	0.15592	0			0		0	0	0	0	0	0
1747	0.709788	0.15867	0			0		0	0	0	0	0	0
1748	0.709382	0.16195	0			0		0	0	0	0	0	0
1749	0.708977	0.16465	0			0		0	0	0	0	0	0
1750	0.708571	0.16566	0			0		0	0	0	0	0	0
1751	0.708167	0.16424	0			0		0	0	0	0	0	0
1752	0.707763	0.16114	0			0		0	0	0	0	0	0
1753	0.707359	0.15749	0			0		0	0	0	0	0	0
1754	0.706956	0.1544	0			0		0	0	0	0	0	0
1755	0.706553	0.15301	0			0		0	0	0	0	0	0
1756	0.70615	0.15403	0			0		0	0	0	0	0	0
1757	0.705748	0.15655	0			0		0	0	0	0	0	0
1758	0.705347	0.15926	0			0		0	0	0	0	0	0
1759	0.704946	0.16084	0			0		0	0	0	0	0	0
1760	0.704545	0.15998	0			0		0	0	0	0	0	0
1761	0.704145	0.15584	0			0		0	0	0	0	0	0
1762	0.703746	0.1495	0			0		0	0	0	0	0	0
1763	0.703347	0.14252	0			0		0	0	0	0	0	0
1764	0.702948	0.13644	0			0		0	0	0	0	0	0
1765	0.70255	0.13284	0			0		0	0	0	0	0	0
1766	0.702152	0.13275	0			0		0	0	0	0	0	0
1767	0.701754	0.13513	0			0		0	0	0	0	0	0
1768	0.701357	0.13845	0			0		0	0	0	0	0	0
1769	0.700961	0.14116	0			0		0	0	0	0	0	0
1770	0.700565	0.14172	0			0		0	0	0	0	0	0
1771	0.700169	0.13903	0			0		0	0	0	0	0	0
1772	0.699774	0.13382	0			0		0	0	0	0	0	0
1773	0.69938	0.12726	0			0		0	0	0	0	0	0
1774	0.698985	0.12054	0			0		0	0	0	0	0	0
1775	0.698592	0.11484	0			0		0	0	0	0	0	0
1776	0.698198	0.111	0			0		0	0	0	0	0	0
1777	0.697805	0.10849	0			0		0	0	0	0	0	0
1778	0.697413	0.10648	0			0		0	0	0	0	0	0
1779	0.697021	0.1041	0			0		0	0	0	0	0	0
1780	0.696629	0.1005	0			0		0	0	0	0	0	0
1781	0.696238	0.09517	0			0		0	0	0	0	0	0
1782	0.695847	0.08896	0			0		0	0	0	0	0	0
1783	0.695457	0.08306	0			0		0	0	0	0	0	0
1784	0.695067	0.07867	0			0		0	0	0	0	0	0
1785	0.694678	0.07698	0			0		0	0	0	0	0	0
1786	0.694289	0.07869	0			0		0	0	0	0	0	0
1787	0.6939	0.08252	0			0		0	0	0	0	0	0
1788	0.693512	0.08668	0			0		0	0	0	0	0	0
1789	0.693125	0.0894	0			0		0	0	0	0	0	0
1790	0.692737	0.0889	0			0		0	0	0	0	0	0
1791	0.692351	0.08398	0			0		0	0	0	0	0	0
1792	0.691964	0.07569	0			0		0	0	0	0	0	0
1793	0.691578	0.06566	0			0		0	0	0	0	0	0
1794	0.691193	0.05553	0			0		0	0	0	0	0	0
1795	0.690808	0.04693	0			0		0	0	0	0	0	0
1796	0.690423	0.04107	0			0		0	0	0	0	0	0
1797	0.690039	0.0375	0			0		0	0	0	0	0	0
1798	0.689655	0.03534	0			0		0	0	0	0	0	0
1799	0.689272	0.03374	0			0		0	0	0	0	0	0
1800	0.688889	0.03183	0			0		0	0	0	0	0	0
1801	0.688506	0.02895	0			0		0	0	0	0	0	0
1802	0.688124	0.02535	0			0		0	0	0	0	0	0
1803	0.687743	0.02149	0			0		0	0	0	0	0	0
1804	0.687361	0.01782	0			0		0	0	0	0	0	0
1805	0.686981	0.01482	0			0		0	0	0	0	0	0
1806	0.6866	0.0128	0			0		0	0	0	0	0	0
1807	0.68622	0.01159	0			0		0	0	0	0	0	0
1808	0.685841	0.01088	0			0		0	0	0	0	0	0
1809	0.685462	0.01035	0			0		0	0	0	0	0	0
1810	0.685083	0.00969	0			0		0	0	0	0	0	0
1811	0.684705	0.00867	0			0		0	0	0	0	0	0
1812	0.684327	0.00737	0			0		0	0	0	0	0	0
1813	0.683949	0.00593	0			0		0	0	0	0	0	0
1814	0.683572	0.00452	0			0		0	0	0	0	0	0
1815	0.683196	0.00328	0			0		0	0	0	0	0	0
1816	0.682819	0.00234	0			0		0	0	0	0	0	0
1817	0.682444	0.00168	0			0		0	0	0	0	0	0
1818	0.682068	0.00127	0			0		0	0	0	0	0	0
1819	0.681693	0.00105	0			0		0	0	0	0	0	0
1820	0.681319	0.00098755	0			0		0	0	0	0	0	0
1821	0.680945	0.00103	0			0		0	0	0	0	0	0
1822	0.680571	0.00114	0			0		0	0	0	0	0	0
1823	0.680197	0.00125	0			0		0	0	0	0	0	0
1824	0.679825	0.00131	0			0		0	0	0	0	0	0
1825	0.679452	0.00127	0			0		0	0	0	0	0	0
1826	0.67908	0.0011	0			0		0	0	0	0	0	0
1827	0.678708	0.000837774	0			0		0	0	0	0	0	0
1828	0.678337	0.000529108	0			0		0	0	0	0	0	0
1829	0.677966	0.000233309	0			0		0	0	0	0	0	0
1830	0.677596	5.2041e-06	0			0		0	0	0	0	0	0
1831	0.677226	-0.00011472	0			0		0	0	0	0	0	0
1832	0.676856	-0.000143342	0			0		0	0	0	0	0	0
1833	0.676487	-0.00011188	0			0		0	0	0	0	0	0
1834	0.676118	-5.15538e-05	0			0		0	0	0	0	0	0
1835	0.675749	6.419e-06	0			0		0	0	0	0	0	0
1836	0.675381	3.74731e-05	0			0		0	0	0	0	0	0
1837	0.675014	4.36595e-05	0			0		0	0	0	0	0	0
1838	0.674646	3.36833e-05	0			0		0	0	0	0	0	0
1839	0.674279	1.62493e-05	0			0		0	0	0	0	0	0
1840	0.673913	6.2703e-08	0			0		0	0	0	0	0	0
1841	0.673547	-8.06161e-06	0			0		0	0	0	0	0	0
1842	0.673181	-8.86855e-06	0			0		0	0	0	0	0	0
1843	0.672816	-4.99302e-06	0			0		0	0	0	0	0	0
1844	0.672451	9.3007e-07	0			0		0	0	0	0	0	0
1845	0.672087	6.2658e-06	0			0		0	0	0	0	0	0
1846	0.671723	8.94796e-06	0			0		0	0	0	0	0	0
1847	0.671359	9.18512e-06	0			0		0	0	0	0	0	0
1848	0.670996	7.75454e-06	0			0		0	0	0	0	0	0
1849	0.670633	5.43352e-06	0			0		0	0	0	0	0	0
1850	0.67027	2.9993e-06	0			0		0	0	0	0	0	0
1851	0.669908	1.10076e-06	0			0		0	0	0	0	0	0
1852	0.669546	-1.26871e-07	0			0		0	0	0	0	0	0
1853	0.669185	-6.76765e-07	0			0		0	0	0	0	0	0
1854	0.668824	-5.42097e-07	0			0		0	0	0	0	0	0
1855	0.668464	2.8396e-07	0			0		0	0	0	0	0	0
1856	0.668103	1.77725e-06	0			0		0	0	0	0	0	0
1857	0.667744	3.78968e-06	0			0		0	0	0	0	0	0
1858	0.667384	6.14216e-06	0			0		0	0	0	0	0	0
1859	0.667025	8.65563e-06	0			0		0	0	0	0	0	0
1860	0.666667	1.1151e-05	0			0		0	0	0	0	0	0
1861	0.666308	1.34483e-05	0			0		0	0	0	0	0	0
1862	0.665951	1.53643e-05	0			0		0	0	0	0	0	0
1863	0.665593	1.67147e-05	0			0		0	0	0	0	0	0
1864	0.665236	1.73153e-05	0			0		0	0	0	0	0	0
1865	0.664879	1.6982e-05	0			0		0	0	0	0	0	0
1866	0.664523	1.55716e-05	0			0		0	0	0	0	0	0
1867	0.664167	1.31057e-05	0			0		0	0	0	0	0	0
1868	0.663812	9.64673e-06	0			0		0	0	0	0	0	0
1869	0.663456	5.2574e-06	0			0		0	0	0	0	0	0
1870	0.663102	2.6662e-10	0			0		0	0	0	0	0	0
1871	0.662747	-5.76518e-06	0			0		0	0	0	0	0	0
1872	0.662393	-1.04919e-05	0			0		0	0	0	0	0	0
1873	0.66204	-1.23358e-05	0			0		0	0	0	0	0	0
1874	0.661686	-9.45302e-06	0			0		0	0	0	0	0	0
1875	0.661333	4.513e-10	0			0		0	0	0	0	0	0
1876	0.660981	1.68057e-05	0			0		0	0	0	0	0	0
1877	0.660629	3.74922e-05	0			0		0	0	0	0	0	0
1878	0.660277	5.75265e-05	0			0		0	0	0	0	0	0
1879	0.659925	7.23752e-05	0			0		0	0	0	0	0	0
1880	0.659574	7.7505e-05	0			0		0	0	0	0	0	0
1881	0.659224	7.03439e-05	0			0		0	0	0	0	0	0
1882	0.658874	5.61661e-05	0			0		0	0	0	0	0	0
1883	0.658524	4.22074e-05	0			0		0	0	0	0	0	0
1884	0.658174	3.57034e-05	0			0		0	0	0	0	0	0
1885	0.657825	4.389e-05	0			0		0	0	0	0	0	0
1886	0.657476	7.1322e-05	0			0		0	0	0	0	0	0
1887	0.657128	0.000111831	0			0		0	0	0	0	0	0
1888	0.65678	0.000156568	0			0		0	0	0	0	0	0
1889	0.656432	0.000196684	0			0		0	0	0	0	0	0
1890	0.656085	0.00022333	0			0		0	0	0	0	0	0
1891	0.655738	0.000229934	0			0		0	0	0	0	0	0
1892	0.655391	0.000219034	0			0		0	0	0	0	0	0
1893	0.655045	0.000195446	0			0		0	0	0	0	0	0
1894	0.654699	0.000163986	0			0		0	0	0	0	0	0
1895	0.654354	0.00012947	0			0		0	0	0	0	0	0
1896	0.654008	9.60829e-05	0			0		0	0	0	0	0	0
1897	0.653664	6.54918e-05	0			0		0	0	0	0	0	0
1898	0.653319	3.87334e-05	0			0		0	0	0	0	0	0
1899	0.652975	1.68446e-05	0			0		0	0	0	0	0	0
1900	0.652632	8.6221e-07	0			0		0	0	0	0	0	0
1901	0.652288	-8.5392e-06	0			0		0	0	0	0	0	0
1902	0.651945	-1.21335e-05	0			0		0	0	0	0	0	0
1903	0.651603	-1.10566e-05	0			0		0	0	0	0	0	0
1904	0.651261	-6.44453e-06	0			0		0	0	0	0	0	0
1905	0.650919	5.6667e-07	0			0		0	0	0	0	0	0
1906	0.650577	8.77058e-06	0			0		0	0	0	0	0	0
1907	0.650236	1.6679e-05	0			0		0	0	0	0	0	0
1908	0.649895	2.27333e-05	0			0		0	0	0	0	0	0
1909	0.649555	2.53749e-05	0			0		0	0	0	0	0	0
1910	0.649215	2.3045e-05	0			0		0	0	0	0	0	0
1911	0.648875	1.52865e-05	0			0		0	0	0	0	0	0
1912	0.648536	6.04769e-06	0			0		0	0	0	0	0	0
1913	0.648197	3.78345e-07	0			0		0	0	0	0	0	0
1914	0.647858	3.3282e-06	0			0		0	0	0	0	0	0
1915	0.64752	1.9947e-05	0			0		0	0	0	0	0	0
1916	0.647182	5.50115e-05	0			0		0	0	0	0	0	0
1917	0.646844	0.000112206	0			0		0	0	0	0	0	0
1918	0.646507	0.000194943	0			0		0	0	0	0	0	0
1919	0.64617	0.000306634	0			0		0	0	0	0	0	0
1920	0.645833	0.00045069	0			0		0	0	0	0	0	0
1921	0.645497	0.000623805	0			0		0	0	0	0	0	0
1922	0.645161	0.000795804	0			0		0	0	0	0	0	0
1923	0.644826	0.00092979	0			0		0	0	0	0	0	0
1924	0.644491	0.00098887	0			0		0	0	0	0	0	0
1925	0.644156	0.00093615	0			0		0	0	0	0	0	0
1926	0.643821	0.00075752	0			0		0	0	0	0	0	0
1927	0.643487	0.000530014	0			0		0	0	0	0	0	0
1928	0.643154	0.000353449	0			0		0	0	0	0	0	0
1929	0.64282	0.000327645	0			0		0	0	0	0	0	0
1930	0.642487	0.00055242	0			0		0	0	0	0	0	0
1931	0.642154	0.00108	0			0		0	0	0	0	0	0
1932	0.641822	0.00181	0			0		0	0	0	0	0	0
1933	0.64149	0.00258	0			0		0	0	0	0	0	0
1934	0.641158	0.00322	0			0		0	0	0	0	0	0
1935	0.640827	0.00359	0			0		0	0	0	0	0	0
1936	0.640496	0.00359	0			0		0	0	0	0	0	0
1937	0.640165	0.00336	0			0		0	0	0	0	0	0
1938	0.639835	0.0031	0			0		0	0	0	0	0	0
1939	0.639505	0.00301	0			0		0	0	0	0	0	0
1940	0.639175	0.00328	0			0		0	0	0	0	0	0
1941	0.638846	0.00408	0			0		0	0	0	0	0	0
1942	0.638517	0.00533	0			0		0	0	0	0	0	0
1943	0.638188	0.00695	0			0		0	0	0	0	0	0
1944	0.63786	0.00883	0			0		0	0	0	0	0	0
1945	0.637532	0.01086	0			0		0	0	0	0	0	0
1946	0.637205	0.01292	0			0		0	0	0	0	0	0
1947	0.636877	0.01478	0			0		0	0	0	0	0	0
1948	0.63655	0.0162	0			0		0	0	0	0	0	0
1949	0.636224	0.01693	0			0		0	0	0	0	0	0
1950	0.635897	0.01673	0			0		0	0	0	0	0	0
1951	0.635572	0.01548	0			0		0	0	0	0	0	0
1952	0.635246	0.01362	0			0		0	0	0	0	0	0
1953	0.634921	0.01171	0			0		0	0	0	0	0	0
1954	0.634596	0.01033	0			0		0	0	0	0	0	0
1955	0.634271	0.01004	0			0		0	0	0	0	0	0
1956	0.633947	0.01122	0			0		0	0	0	0	0	0
1957	0.633623	0.01354	0			0		0	0	0	0	0	0
1958	0.633299	0.01644	0			0		0	0	0	0	0	0
1959	0.632976	0.01941	0			0		0	0	0	0	0	0
1960	0.632653	0.02191	0			0		0	0	0	0	0	0
1961	0.63233	0.02355	0			0		0	0	0	0	0	0
1962	0.632008	0.02462	0			0		0	0	0	0	0	0
1963	0.631686	0.02553	0			0		0	0	0	0	0	0
1964	0.631365	0.0267	0			0		0	0	0	0	0	0
1965	0.631043	0.02856	0			0		0	0	0	0	0	0
1966	0.630722	0.03143	0			0		0	0	0	0	0	0
1967	0.630402	0.03514	0			0		0	0	0	0	0	0
1968	0.630081	0.03946	0			0		0	0	0	0	0	0
1969	0.629761	0.04411	0			0		0	0	0	0	0	0
1970	0.629442	0.04885	0			0		0	0	0	0	0	0
1971	0.629122	0.05343	0			0		0	0	0	0	0	0
1972	0.628803	0.05773	0			0		0	0	0	0	0	0
1973	0.628485	0.06164	0			0		0	0	0	0	0	0
1974	0.628166	0.06505	0			0		0	0	0	0	0	0
1975	0.627848	0.06786	0			0		0	0	0	0	0	0
1976	0.62753	0.07001	0			0		0	0	0	0	0	0
1977	0.627213	0.07165	0			0		0	0	0	0	0	0
1978	0.626896	0.07298	0			0		0	0	0	0	0	0
1979	0.626579	0.0742	0			0		0	0	0	0	0	0
1980	0.626263	0.07551	0			0		0	0	0	0	0	0
1981	0.625946	0.07705	0			0		0	0	0	0	0	0
1982	0.625631	0.07872	0			0		0	0	0	0	0	0
1983	0.625315	0.08038	0			0		0	0	0	0	0	0
1984	0.625	0.08188	0			0		0	0	0	0	0	0
1985	0.624685	0.08306	0			0		0	0	0	0	0	0
1986	0.624371	0.08384	0			0		0	0	0	0	0	0
1987	0.624056	0.08432	0			0		0	0	0	0	0	0
1988	0.623742	0.08467	0			0		0	0	0	0	0	0
1989	0.623429	0.08504	0			0		0	0	0	0	0	0
1990	0.623116	0.08561	0			0		0	0	0	0	0	0
1991	0.622803	0.08641	0			0		0	0	0	0	0	0
1992	0.62249	0.08697	0			0		0	0	0	0	0	0
1993	0.622178	0.08669	0			0		0	0	0	0	0	0
1994	0.621866	0.08496	0			0		0	0	0	0	0	0
1995	0.621554	0.08119	0			0		0	0	0	0	0	0
1996	0.621242	0.07499	0			0		0	0	0	0	0	0
1997	0.620931	0.06687	0			0		0	0	0	0	0	0
1998	0.620621	0.05755	0			0		0	0	0	0	0	0
1999	0.62031	0.04773	0			0		0	0	0	0	0	0
2000	0.62	0.03816	0			0		0	0	0	0	0	0
2001	0.61969	0.0295	0			0		0	0	0	0	0	0
2002	0.619381	0.02233	0			0		0	0	0	0	0	0
2003	0.619071	0.01716	0			0		0	0	0	0	0	0
2004	0.618762	0.01455	0			0		0	0	0	0	0	0
2005	0.618454	0.015	0			0		0	0	0	0	0	0
2006	0.618146	0.01872	0			0		0	0	0	0	0	0
2007	0.617838	0.02455	0			0		0	0	0	0	0	0
2008	0.61753	0.03099	0			0		0	0	0	0	0	0
2009	0.617222	0.03656	0			0		0	0	0	0	0	0
2010	0.616915	0.03975	0			0		0	0	0	0	0	0
2011	0.616609	0.03954	0			0		0	0	0	0	0	0
2012	0.616302	0.0368	0			0		0	0	0	0	0	0
2013	0.615996	0.03285	0			0		0	0	0	0	0	0
2014	0.61569	0.02902	0			0		0	0	0	0	0	0
2015	0.615385	0.02665	0			0		0	0	0	0	0	0
2016	0.615079	0.02675	0			0		0	0	0	0	0	0
2017	0.614774	0.02913	0			0		0	0	0	0	0	0
2018	0.61447	0.0333	0			0		0	0	0	0	0	0
2019	0.614165	0.03875	0			0		0	0	0	0	0	0
2020	0.613861	0.04498	0			0		0	0	0	0	0	0
2021	0.613558	0.05153	0			0		0	0	0	0	0	0
2022	0.613254	0.05804	0			0		0	0	0	0	0	0
2023	0.612951	0.06417	0			0		0	0	0	0	0	0
2024	0.612648	0.06961	0			0		0	0	0	0	0	0
2025	0.612346	0.07401	0			0		0	0	0	0	0	0
2026	0.612043	0.07718	0			0		0	0	0	0	0	0
2027	0.611741	0.07942	0			0		0	0	0	0	0	0
2028	0.61144	0.08116	0			0		0	0	0	0	0	0
2029	0.611138	0.08283	0			0		0	0	0	0	0	0
2030	0.610837	0.08486	0			0		0	0	0	0	0	0
2031	0.610537	0.08752	0			0		0	0	0	0	0	0
2032	0.610236	0.09049	0			0		0	0	0	0	0	0
2033	0.609936	0.09328	0			0		0	0	0	0	0	0
2034	0.609636	0.0954	0			0		0	0	0	0	0	0
2035	0.609337	0.09639	0			0		0	0	0	0	0	0
2036	0.609037	0.09592	0			0		0	0	0	0	0	0
2037	0.608738	0.09443	0			0		0	0	0	0	0	0
2038	0.60844	0.09251	0			0		0	0	0	0	0	0
2039	0.608141	0.09076	0			0		0	0	0	0	0	0
2040	0.607843	0.08978	0			0		0	0	0	0	0	0
2041	0.607545	0.08996	0			0		0	0	0	0	0	0
2042	0.607248	0.09085	0			0		0	0	0	0	0	0
2043	0.606951	0.09177	0			0		0	0	0	0	0	0
2044	0.606654	0.09207	0			0		0	0	0	0	0	0
2045	0.606357	0.09107	0			0		0	0	0	0	0	0
2046	0.606061	0.08832	0			0		0	0	0	0	0	0
2047	0.605765	0.08412	0			0		0	0	0	0	0	0
2048	0.605469	0.07898	0			0		0	0	0	0	0	0
2049	0.605173	0.07341	0			0		0	0	0	0	0	0
2050	0.604878	0.06793	0			0		0	0	0	0	0	0
2051	0.604583	0.063	0			0		0	0	0	0	0	0
2052	0.604288	0.05895	0			0		0	0	0	0	0	0
2053	0.603994	0.05606	0			0		0	0	0	0	0	0
2054	0.6037	0.05462	0			0		0	0	0	0	0	0
2055	0.603406	0.05491	0			0		0	0	0	0	0	0
2056	0.603113	0.05702	0			0		0	0	0	0	0	0
2057	0.60282	0.06032	0			0		0	0	0	0	0	0
2058	0.602527	0.064	0			0		0	0	0	0	0	0
2059	0.602234	0.06723	0			0		0	0	0	0	0	0
2060	0.601942	0.06919	0			0		0	0	0	0	0	0
2061	0.60165	0.06932	0			0		0	0	0	0	0	0
2062	0.601358	0.068	0			0		0	0	0	0	0	0
2063	0.601066	0.06589	0			0		0	0	0	0	0	0
2064	0.600775	0.06364	0			0		0	0	0	0	0	0
2065	0.600484	0.06187	0			0		0	0	0	0	0	0
2066	0.600194	0.06111	0			0		0	0	0	0	0	0
2067	0.599903	0.0613	0			0		0	0	0	0	0	0
2068	0.599613	0.06226	0			0		0	0	0	0	0	0
2069	0.599323	0.06378	0			0		0	0	0	0	0	0
2070	0.599034	0.06568	0			0		0	0	0	0	0	0
2071	0.598745	0.06779	0			0		0	0	0	0	0	0
2072	0.598456	0.07006	0			0		0	0	0	0	0	0
2073	0.598167	0.07245	0			0		0	0	0	0	0	0
2074	0.597878	0.07492	0			0		0	0	0	0	0	0
2075	0.59759	0.07744	0			0		0	0	0	0	0	0
2076	0.597303	0.07996	0			0		0	0	0	0	0	0
2077	0.597015	0.08232	0			0		0	0	0	0	0	0
2078	0.596728	0.08436	0			0		0	0	0	0	0	0
2079	0.596441	0.08591	0			0		0	0	0	0	0	0
2080	0.596154	0.08681	0			0		0	0	0	0	0	0
2081	0.595867	0.08697	0			0		0	0	0	0	0	0
2082	0.595581	0.08659	0			0		0	0	0	0	0	0
2083	0.595295	0.08596	0			0		0	0	0	0	0	0
2084	0.59501	0.08537	0			0		0	0	0	0	0	0
2085	0.594724	0.0851	0			0		0	0	0	0	0	0
2086	0.594439	0.08536	0			0		0	0	0	0	0	0
2087	0.594154	0.08607	0			0		0	0	0	0	0	0
2088	0.59387	0.08703	0			0		0	0	0	0	0	0
2089	0.593585	0.0881	0			0		0	0	0	0	0	0
2090	0.593301	0.0891	0			0		0	0	0	0	0	0
2091	0.593018	0.08988	0			0		0	0	0	0	0	0
2092	0.592734	0.09037	0			0		0	0	0	0	0	0
2093	0.592451	0.09055	0			0		0	0	0	0	0	0
2094	0.592168	0.09035	0			0		0	0	0	0	0	0
2095	0.591885	0.08975	0			0		0	0	0	0	0	0
2096	0.591603	0.08875	0			0		0	0	0	0	0	0
2097	0.591321	0.08759	0			0		0	0	0	0	0	0
2098	0.591039	0.08658	0			0		0	0	0	0	0	0
2099	0.590758	0.08599	0			0		0	0	0	0	0	0
2100	0.590476	0.08613	0			0		0	0	0	0	0	0
2101	0.590195	0.08718	0			0		0	0	0	0	0	0
2102	0.589914	0.08882	0			0		0	0	0	0	0	0
2103	0.589634	0.09064	0			0		0	0	0	0	0	0
2104	0.589354	0.09223	0			0		0	0	0	0	0	0
2105	0.589074	0.09315	0			0		0	0	0	0	0	0
2106	0.588794	0.09313	0			0		0	0	0	0	0	0
2107	0.588514	0.0924	0			0		0	0	0	0	0	0
2108	0.588235	0.09133	0			0		0	0	0	0	0	0
2109	0.587956	0.09029	0			0		0	0	0	0	0	0
2110	0.587678	0.08965	0			0		0	0	0	0	0	0
2111	0.587399	0.08968	0			0		0	0	0	0	0	0
2112	0.587121	0.09019	0			0		0	0	0	0	0	0
2113	0.586843	0.09088	0			0		0	0	0	0	0	0
2114	0.586566	0.09147	0			0		0	0	0	0	0	0
2115	0.586288	0.09167	0			0		0	0	0	0	0	0
2116	0.586011	0.09127	0			0		0	0	0	0	0	0
2117	0.585735	0.09043	0			0		0	0	0	0	0	0
2118	0.585458	0.08937	0			0		0	0	0	0	0	0
2119	0.585182	0.08835	0			0		0	0	0	0	0	0
2120	0.584906	0.08759	0			0		0	0	0	0	0	0
2121	0.58463	0.08728	0			0		0	0	0	0	0	0
2122	0.584354	0.08735	0			0		0	0	0	0	0	0
2123	0.584079	0.08768	0			0		0	0	0	0	0	0
2124	0.583804	0.08815	0			0		0	0	0	0	0	0
2125	0.583529	0.08863	0			0		0	0	0	0	0	0
2126	0.583255	0.08902	0			0		0	0	0	0	0	0
2127	0.582981	0.08932	0			0		0	0	0	0	0	0
2128	0.582707	0.08953	0			0		0	0	0	0	0	0
2129	0.582433	0.08968	0			0		0	0	0	0	0	0
2130	0.58216	0.08977	0			0		0	0	0	0	0	0
2131	0.581886	0.08983	0			0		0	0	0	0	0	0
2132	0.581614	0.08987	0			0		0	0	0	0	0	0
2133	0.581341	0.08991	0			0		0	0	0	0	0	0
2134	0.581068	0.08996	0			0		0	0	0	0	0	0
2135	0.580796	0.09004	0			0		0	0	0	0	0	0
2136	0.580524	0.09018	0			0		0	0	0	0	0	0
2137	0.580253	0.09034	0			0		0	0	0	0	0	0
2138	0.579981	0.0905	0			0		0	0	0	0	0	0
2139	0.57971	0.09065	0			0		0	0	0	0	0	0
2140	0.579439	0.09077	0			0		0	0	0	0	0	0
2141	0.579169	0.09082	0			0		0	0	0	0	0	0
2142	0.578898	0.09076	0			0		0	0	0	0	0	0
2143	0.578628	0.09055	0			0		0	0	0	0	0	0
2144	0.578358	0.09014	0			0		0	0	0	0	0	0
2145	0.578089	0.08949	0			0		0	0	0	0	0	0
2146	0.577819	0.08857	0			0		0	0	0	0	0	0
2147	0.57755	0.0875	0			0		0	0	0	0	0	0
2148	0.577281	0.0864	0			0		0	0	0	0	0	0
2149	0.577013	0.0854	0			0		0	0	0	0	0	0
2150	0.576744	0.08464	0			0		0	0	0	0	0	0
2151	0.576476	0.08421	0			0		0	0	0	0	0	0
2152	0.576208	0.08408	0			0		0	0	0	0	0	0
2153	0.575941	0.08418	0			0		0	0	0	0	0	0
2154	0.575673	0.08446	0			0		0	0	0	0	0	0
2155	0.575406	0.08484	0			0		0	0	0	0	0	0
2156	0.575139	0.08525	0			0		0	0	0	0	0	0
2157	0.574873	0.08555	0			0		0	0	0	0	0	0
2158	0.574606	0.08557	0			0		0	0	0	0	0	0
2159	0.57434	0.08517	0			0		0	0	0	0	0	0
2160	0.574074	0.08417	0			0		0	0	0	0	0	0
2161	0.573808	0.08252	0			0		0	0	0	0	0	0
2162	0.573543	0.08051	0			0		0	0	0	0	0	0
2163	0.573278	0.07854	0			0		0	0	0	0	0	0
2164	0.573013	0.07701	0			0		0	0	0	0	0	0
2165	0.572748	0.07631	0			0		0	0	0	0	0	0
2166	0.572484	0.0767	0			0		0	0	0	0	0	0
2167	0.57222	0.07788	0			0		0	0	0	0	0	0
2168	0.571956	0.07944	0			0		0	0	0	0	0	0
2169	0.571692	0.08096	0			0		0	0	0	0	0	0
2170	0.571429	0.082	0			0		0	0	0	0	0	0
2171	0.571165	0.08226	0			0		0	0	0	0	0	0
2172	0.570902	0.08193	0			0		0	0	0	0	0	0
2173	0.57064	0.08131	0			0		0	0	0	0	0	0
2174	0.570377	0.08072	0			0		0	0	0	0	0	0
2175	0.570115	0.08045	0			0		0	0	0	0	0	0
2176	0.569853	0.08071	0			0		0	0	0	0	0	0
2177	0.569591	0.08129	0			0		0	0	0	0	0	0
2178	0.56933	0.08187	0			0		0	0	0	0	0	0
2179	0.569068	0.08215	0			0		0	0	0	0	0	0
2180	0.568807	0.08181	0			0		0	0	0	0	0	0
2181	0.568547	0.08065	0			0		0	0	0	0	0	0
2182	0.568286	0.07895	0			0		0	0	0	0	0	0
2183	0.568026	0.0771	0			0		0	0	0	0	0	0
2184	0.567766	0.0755	0			0		0	0	0	0	0	0
2185	0.567506	0.07455	0			0		0	0	0	0	0	0
2186	0.567246	0.07452	0			0		0	0	0	0	0	0
2187	0.566987	0.07525	0			0		0	0	0	0	0	0
2188	0.566728	0.07644	0			0		0	0	0	0	0	0
2189	0.566469	0.07781	0			0		0	0	0	0	0	0
2190	0.56621	0.07907	0			0		0	0	0	0	0	0
2191	0.565952	0.07997	0			0		0	0	0	0	0	0
2192	0.565693	0.08044	0			0		0	0	0	0	0	0
2193	0.565435	0.08046	0			0		0	0	0	0	0	0
2194	0.565178	0.07998	0			0		0	0	0	0	0	0
2195	0.56492	0.07899	0			0		0	0	0	0	0	0
2196	0.564663	0.0775	0			0		0	0	0	0	0	0
2197	0.564406	0.07572	0			0		0	0	0	0	0	0
2198	0.564149	0.0739	0			0		0	0	0	0	0	0
2199	0.563893	0.07231	0			0		0	0	0	0	0	0
2200	0.563636	0.0712	0			0		0	0	0	0	0	0
2201	0.56338	0.07077	0			0		0	0	0	0	0	0
2202	0.563124	0.07096	0			0		0	0	0	0	0	0
2203	0.562869	0.07164	0			0		0	0	0	0	0	0
2204	0.562613	0.0727	0			0		0	0	0	0	0	0
2205	0.562358	0.07401	0			0		0	0	0	0	0	0
2206	0.562103	0.07545	0			0		0	0	0	0	0	0
2207	0.561849	0.07686	0			0		0	0	0	0	0	0
2208	0.561594	0.07808	0			0		0	0	0	0	0	0
2209	0.56134	0.07895	0			0		0	0	0	0	0	0
2210	0.561086	0.07931	0			0		0	0	0	0	0	0
2211	0.560832	0.07907	0			0		0	0	0	0	0	0
2212	0.560579	0.0784	0			0		0	0	0	0	0	0
2213	0.560325	0.07755	0			0		0	0	0	0	0	0
2214	0.560072	0.07676	0			0		0	0	0	0	0	0
2215	0.559819	0.07627	0			0		0	0	0	0	0	0
2216	0.559567	0.07626	0			0		0	0	0	0	0	0
2217	0.559314	0.0766	0			0		0	0	0	0	0	0
2218	0.559062	0.07709	0			0		0	0	0	0	0	0
2219	0.55881	0.07753	0			0		0	0	0	0	0	0
2220	0.558559	0.07773	0			0		0	0	0	0	0	0
2221	0.558307	0.07755	0			0		0	0	0	0	0	0
2222	0.558056	0.07708	0			0		0	0	0	0	0	0
2223	0.557805	0.07647	0			0		0	0	0	0	0	0
2224	0.557554	0.07588	0			0		0	0	0	0	0	0
2225	0.557303	0.07545	0			0		0	0	0	0	0	0
2226	0.557053	0.07531	0			0		0	0	0	0	0	0
2227	0.556803	0.07537	0			0		0	0	0	0	0	0
2228	0.556553	0.07554	0			0		0	0	0	0	0	0
2229	0.556303	0.07571	0			0		0	0	0	0	0	0
2230	0.556054	0.07577	0			0		0	0	0	0	0	0
2231	0.555805	0.07564	0			0		0	0	0	0	0	0
2232	0.555556	0.07536	0			0		0	0	0	0	0	0
2233	0.555307	0.075	0			0		0	0	0	0	0	0
2234	0.555058	0.07462	0			0		0	0	0	0	0	0
2235	0.55481	0.0743	0			0		0	0	0	0	0	0
2236	0.554562	0.07407	0			0		0	0	0	0	0	0
2237	0.554314	0.0739	0			0		0	0	0	0	0	0
2238	0.554066	0.07373	0			0		0	0	0	0	0	0
2239	0.553819	0.07349	0			0		0	0	0	0	0	0
2240	0.553571	0.07312	0			0		0	0	0	0	0	0
2241	0.553324	0.07259	0			0		0	0	0	0	0	0
2242	0.553078	0.07199	0			0		0	0	0	0	0	0
2243	0.552831	0.07142	0			0		0	0	0	0	0	0
2244	0.552585	0.071	0			0		0	0	0	0	0	0
2245	0.552339	0.07084	0			0		0	0	0	0	0	0
2246	0.552093	0.071	0			0		0	0	0	0	0	0
2247	0.551847	0.07137	0			0		0	0	0	0	0	0
2248	0.551601	0.07176	0			0		0	0	0	0	0	0
2249	0.551356	0.07201	0			0		0	0	0	0	0	0
2250	0.551111	0.07194	0			0		0	0	0	0	0	0
2251	0.550866	0.07143	0			0		0	0	0	0	0	0
2252	0.550622	0.0706	0			0		0	0	0	0	0	0
2253	0.550377	0.06959	0			0		0	0	0	0	0	0
2254	0.550133	0.06857	0			0		0	0	0	0	0	0
2255	0.549889	0.06769	0			0		0	0	0	0	0	0
2256	0.549645	0.06708	0			0		0	0	0	0	0	0
2257	0.549402	0.06673	0			0		0	0	0	0	0	0
2258	0.549159	0.06661	0			0		0	0	0	0	0	0
2259	0.548915	0.06669	0			0		0	0	0	0	0	0
2260	0.548673	0.06693	0			0		0	0	0	0	0	0
2261	0.54843	0.06729	0			0		0	0	0	0	0	0
2262	0.548187	0.06768	0			0		0	0	0	0	0	0
2263	0.547945	0.06802	0			0		0	0	0	0	0	0
2264	0.547703	0.0682	0			0		0	0	0	0	0	0
2265	0.547461	0.06814	0			0		0	0	0	0	0	0
2266	0.54722	0.06776	0			0		0	0	0	0	0	0
2267	0.546978	0.06715	0			0		0	0	0	0	0	0
2268	0.546737	0.06639	0			0		0	0	0	0	0	0
2269	0.546496	0.0656	0			0		0	0	0	0	0	0
2270	0.546256	0.06487	0			0		0	0	0	0	0	0
2271	0.546015	0.06429	0			0		0	0	0	0	0	0
2272	0.545775	0.06389	0			0		0	0	0	0	0	0
2273	0.545535	0.0637	0			0		0	0	0	0	0	0
2274	0.545295	0.06374	0			0		0	0	0	0	0	0
2275	0.545055	0.06402	0			0		0	0	0	0	0	0
2276	0.544815	0.06454	0			0		0	0	0	0	0	0
2277	0.544576	0.06518	0			0		0	0	0	0	0	0
[truncated: 1,724 more rows]

## Sheet: Instructions for use
	1	All data to be inserted needs to interpolated so that the wavenelgth step size is 1nm
	2	Paste Spectral response External Quantum Efficiency (EQE %) (or Incident Photon-to-electron Conversion Efficiency (IPCE%)) of the test cell into Column H at appropriate wavenegth position (make sure that all other cells are cleared in this column)
	3	Paste Spectral response EQE % or IPCE% of the calibrated reference cell into Column F at appropriate wavenegth position (make sure that all other cells are cleared in this column)
	4	Paste the measured solar simulator power spectrum into column E
	5	The corresponding short-circuit current expected under AM1.5 100mW/cm2 for the test cell and the calibration diode, along with the mismatch factor are displayed in column R
